# Supplementary material
Source: MDPI journal article supplement (https://www.mdpi.com/2073-4395/11/3/406)
Supplement: s1 [file s1]

Table S3: The detailed information about *NtZF-HD* genes and NtZF-HD proteins in tobacco.

| Gene name | Lcus name               | ORF (bp) | Length (aa) | PI    | Mol.wt (kDa) | Domain (start-end) |                  | location                        | Subcellular Localization |
|-----------|-------------------------|----------|-------------|-------|--------------|--------------------|------------------|---------------------------------|--------------------------|
| NtZHD1    | Nitab4.5_0003309g0010.1 | 546      | 181         | 9.04  | 20.28        | 8-67               | Nt06             | 113975771...113976316 (+strand) | Nuclear                  |
| NtZHD2    | Nitab4.5_0001418g0030.1 | 3078     | 1025        | 6.41  | 113.63       | 790-844            | Nt07             | 96976123...96982607 (-strand)   | Nuclear                  |
| NtZHD3    | Nitab4.5_0002224g0080.1 | 798      | 265         | 8.88  | 29.5         | 48-102             | Nt12             | 111194877...111196404 (+strand) | Nuclear                  |
| NtZHD4    | Nitab4.5_0000014g0020.1 | 672      | 223         | 9.7   | 25.66        | 57-113             | Nt12             | 32300289...32300960 (+strand)   | Nuclear                  |
| NtZHD5    | Nitab4.5_0001507g0130.1 | 765      | 254         | 7.41  | 28.44        | 52-106             | Nt12             | 90169840...90170782 (-strand)   | Nuclear                  |
| NtZHD6    | Nitab4.5_0006178g0010.1 | 741      | 246         | 8.67  | 27.81        | 56-110             | Nt10             | 42535149...42535889 (-strand)   | Nuclear                  |
| NtZHD7    | Nitab4.5_0001122g0170.1 | 726      | 241         | 6.79  | 27.37        | 54-108             | Nt16             | 3290623...3292490 (+strand)     | Nuclear                  |
| NtZHD8    | Nitab4.5_0002472g0040.1 | 648      | 215         | 10.04 | 24.3         | 47-103             | Nt16             | 39218342...39218989 (-strand)   | Nuclear                  |
| NtZHD9    | Nitab4.5_0000136g0410.1 | 864      | 287         | 9.26  | 32.34        | 104-155            | Nt17             | 89101573...89102445 (-strand)   | Nuclear                  |
| NtZHD10   | Nitab4.5_0000274g0220.1 | 1071     | 356         | 8.76  | 39.1         | 66-122             | Nt17             | 104345979...104347049 (-strand) | Nuclear                  |
| NtZHD11   | Nitab4.5_0000564g0050.1 | 483      | 160         | 9     | 18.03        | 26-78              | Nt17             | 162919345...162920954 (+strand) | Nuclear                  |
| NtZHD12   | Nitab4.5_0003247g0060.1 | 765      | 254         | 8.04  | 28.76        | 48-79              | Nt19             | 130006610...130007980 (-strand) | Nuclear                  |
| NtZHD13   | Nitab4.5_0000460g0070.1 | 786      | 261         | 8.47  | 29.76        | 67-121             | Nitab4.5_0000460 | 605752...606537 (-strand)       | Nuclear                  |
| NtZHD14   | Nitab4.5_0000948g0160.1 | 531      | 176         | 6.98  | 19.5         | 14-66              | Nitab4.5_0000948 | 456370...456900 (-strand)       | Chloroplast,Nucleus      |
| NtZHD15   | Nitab4.5_0000948g0180.1 | 552      | 183         | 9.06  | 20.87        | 9-60               | Nitab4.5_0000948 | 478268...479407 (-strand)       | Nuclear                  |
| NtZHD16   | Nitab4.5_0000948g0190.1 | 984      | 327         | 7.44  | 35.96        | 24-74              | Nitab4.5_0000948 | 474971...476529 (-strand)       | Nuclear                  |
| NtZHD17   | Nitab4.5_0001759g0020.1 | 870      | 289         | 8.82  | 31.94        | 75-129             | Nitab4.5_0001759 | 147719...149283 (+strand)       | Nuclear                  |
| NtZHD18   | Nitab4.5_0005164g0020.1 | 819      | 272         | 7.77  | 30.49        | 47-95              | Nitab4.5_0005164 | 50007...51473 (-strand)         | Nuclear                  |

|         |                         |      |     |       |       |         |                  |                           |         |
|---------|-------------------------|------|-----|-------|-------|---------|------------------|---------------------------|---------|
| NtZHD19 | Nitab4.5_0003597g0010.1 | 681  | 226 | 6.9   | 25.7  | 50-104  | Nitab4.5_0003597 | 142958...143638 (+strand) | Nuclear |
| NtZHD20 | Nitab4.5_0005738g0020.1 | 2574 | 857 | 6.79  | 94.11 | 739-793 | Nitab4.5_0005738 | 77234...84914 (-strand)   | Nuclear |
| NtZHD21 | Nitab4.5_0002025g0010.1 | 687  | 228 | 6.79  | 25.69 | 51-105  | Nitab4.5_0002025 | 16169...16855 (+strand)   | Nuclear |
| NtZHD22 | Nitab4.5_0001960g0020.1 | 936  | 311 | 8.02  | 35.02 | 102-156 | Nitab4.5_0001960 | 43239...44174 (+strand)   | Nuclear |
| NtZHD23 | Nitab4.5_0002698g0010.1 | 501  | 166 | 7.5   | 18.38 | 9-63    | Nitab4.5_0002698 | 14422...21460 (-strand)   | Nuclear |
| NtZHD24 | Nitab4.5_0002698g0080.1 | 591  | 196 | 9.86  | 22.57 | 11-62   | Nitab4.5_0002698 | 90457...91694 (-strand)   | Nuclear |
| NtZHD25 | Nitab4.5_0002698g0100.1 | 996  | 331 | 6.37  | 36.07 | 24-78   | Nitab4.5_0002698 | 87577...89089 (-strand)   | Nuclear |
| NtZHD26 | Nitab4.5_0018250g0010.1 | 936  | 311 | 8.24  | 34.8  | 102-156 | Nitab4.5_0018250 | 4332...5267 (-strand)     | Nuclear |
| NtZHD27 | Nitab4.5_0004308g0050.1 | 1077 | 358 | 8.7   | 39.28 | 69-125  | Nitab4.5_0004308 | 111992...113068 (+strand) | Nuclear |
| NtZHD28 | Nitab4.5_0008838g0010.1 | 417  | 138 | 10.25 | 15.59 | 27-79   | Nitab4.5_0008838 | 42640...44329 (+strand)   | Nuclear |
| NtZHD29 | Nitab4.5_0008838g0020.1 | 1077 | 358 | 8.18  | 38.74 | 65-121  | Nitab4.5_0008838 | 97301...98377 (-strand)   | Nuclear |
| NtZHD30 | Nitab4.5_0007822g0010.1 | 717  | 238 | 8.02  | 26.96 | 50-104  | Nitab4.5_0007822 | 23092...24551 (-strand)   | Nuclear |
| NtZHD31 | Nitab4.5_0000128g0140.1 | 690  | 229 | 7.97  | 25.88 | 50-104  | Nitab4.5_0000128 | 555877...557276 (-strand) | Nuclear |
| NtZHD32 | Nitab4.5_0008595g0010.1 | 1086 | 361 | 8.18  | 39.24 | 68-124  | Nitab4.5_0008595 | 97991...99076 (-strand)   | Nuclear |

---

ORF, open reading frame; bp, base pair; aa, amino acid, pI, isoelectric point; kDa, kilodaltons.
