# Supplementary material
Source: MDPI journal article supplement (https://www.mdpi.com/2073-4395/11/3/406)
Supplement: s1 [file s1]

Table S4. The amino acid sequences of Motifs

| Motif    | The amino acid sequence of motif         | Number of amino acids |
|----------|------------------------------------------|-----------------------|
| Motif 1  | VRYKECLKNHAASJGGHAVDGCGEFMPSG            | 29                    |
| Motif 2  | KKRFRTKFTQEQKEKMLEFAEKLGWRIQK            | 29                    |
| Motif 3  | EALKCAACGCHRNFRKEVEG                     | 21                    |
| Motif 4  | DEEEVQQFCNEIGVKRQVFKVWMHNNKNT            | 29                    |
| Motif 5  | GDHSSPNSPSPPISSAYYPASAPHMLLALSAGFSGEKNQN | 41                    |
| Motif 6  | KSPEAEIETPTRIQPAKPISFSNGVLKRH            | 29                    |
| Motif 7  | PIATAAJEYQPHHRHHPPPPP                    | 21                    |
| Motif 8  | YHYHVAPHQRPLALPSTSGGG                    | 21                    |
| Motif 9  | MELPGQEKEMGMPNSSGYNS                     | 20                    |
| Motif 10 | QH HH HKGRHVYSTGPPQPVKMAFGGNGGG          | 29                    |
| Motif 11 | VRYKECLKNHAASJGGHAVDGCGEFMPSG            | 29                    |
