# Supplementary material
Source: MDPI journal article supplement (https://www.mdpi.com/2073-4395/11/3/406)
Supplement: s1 [file s1]

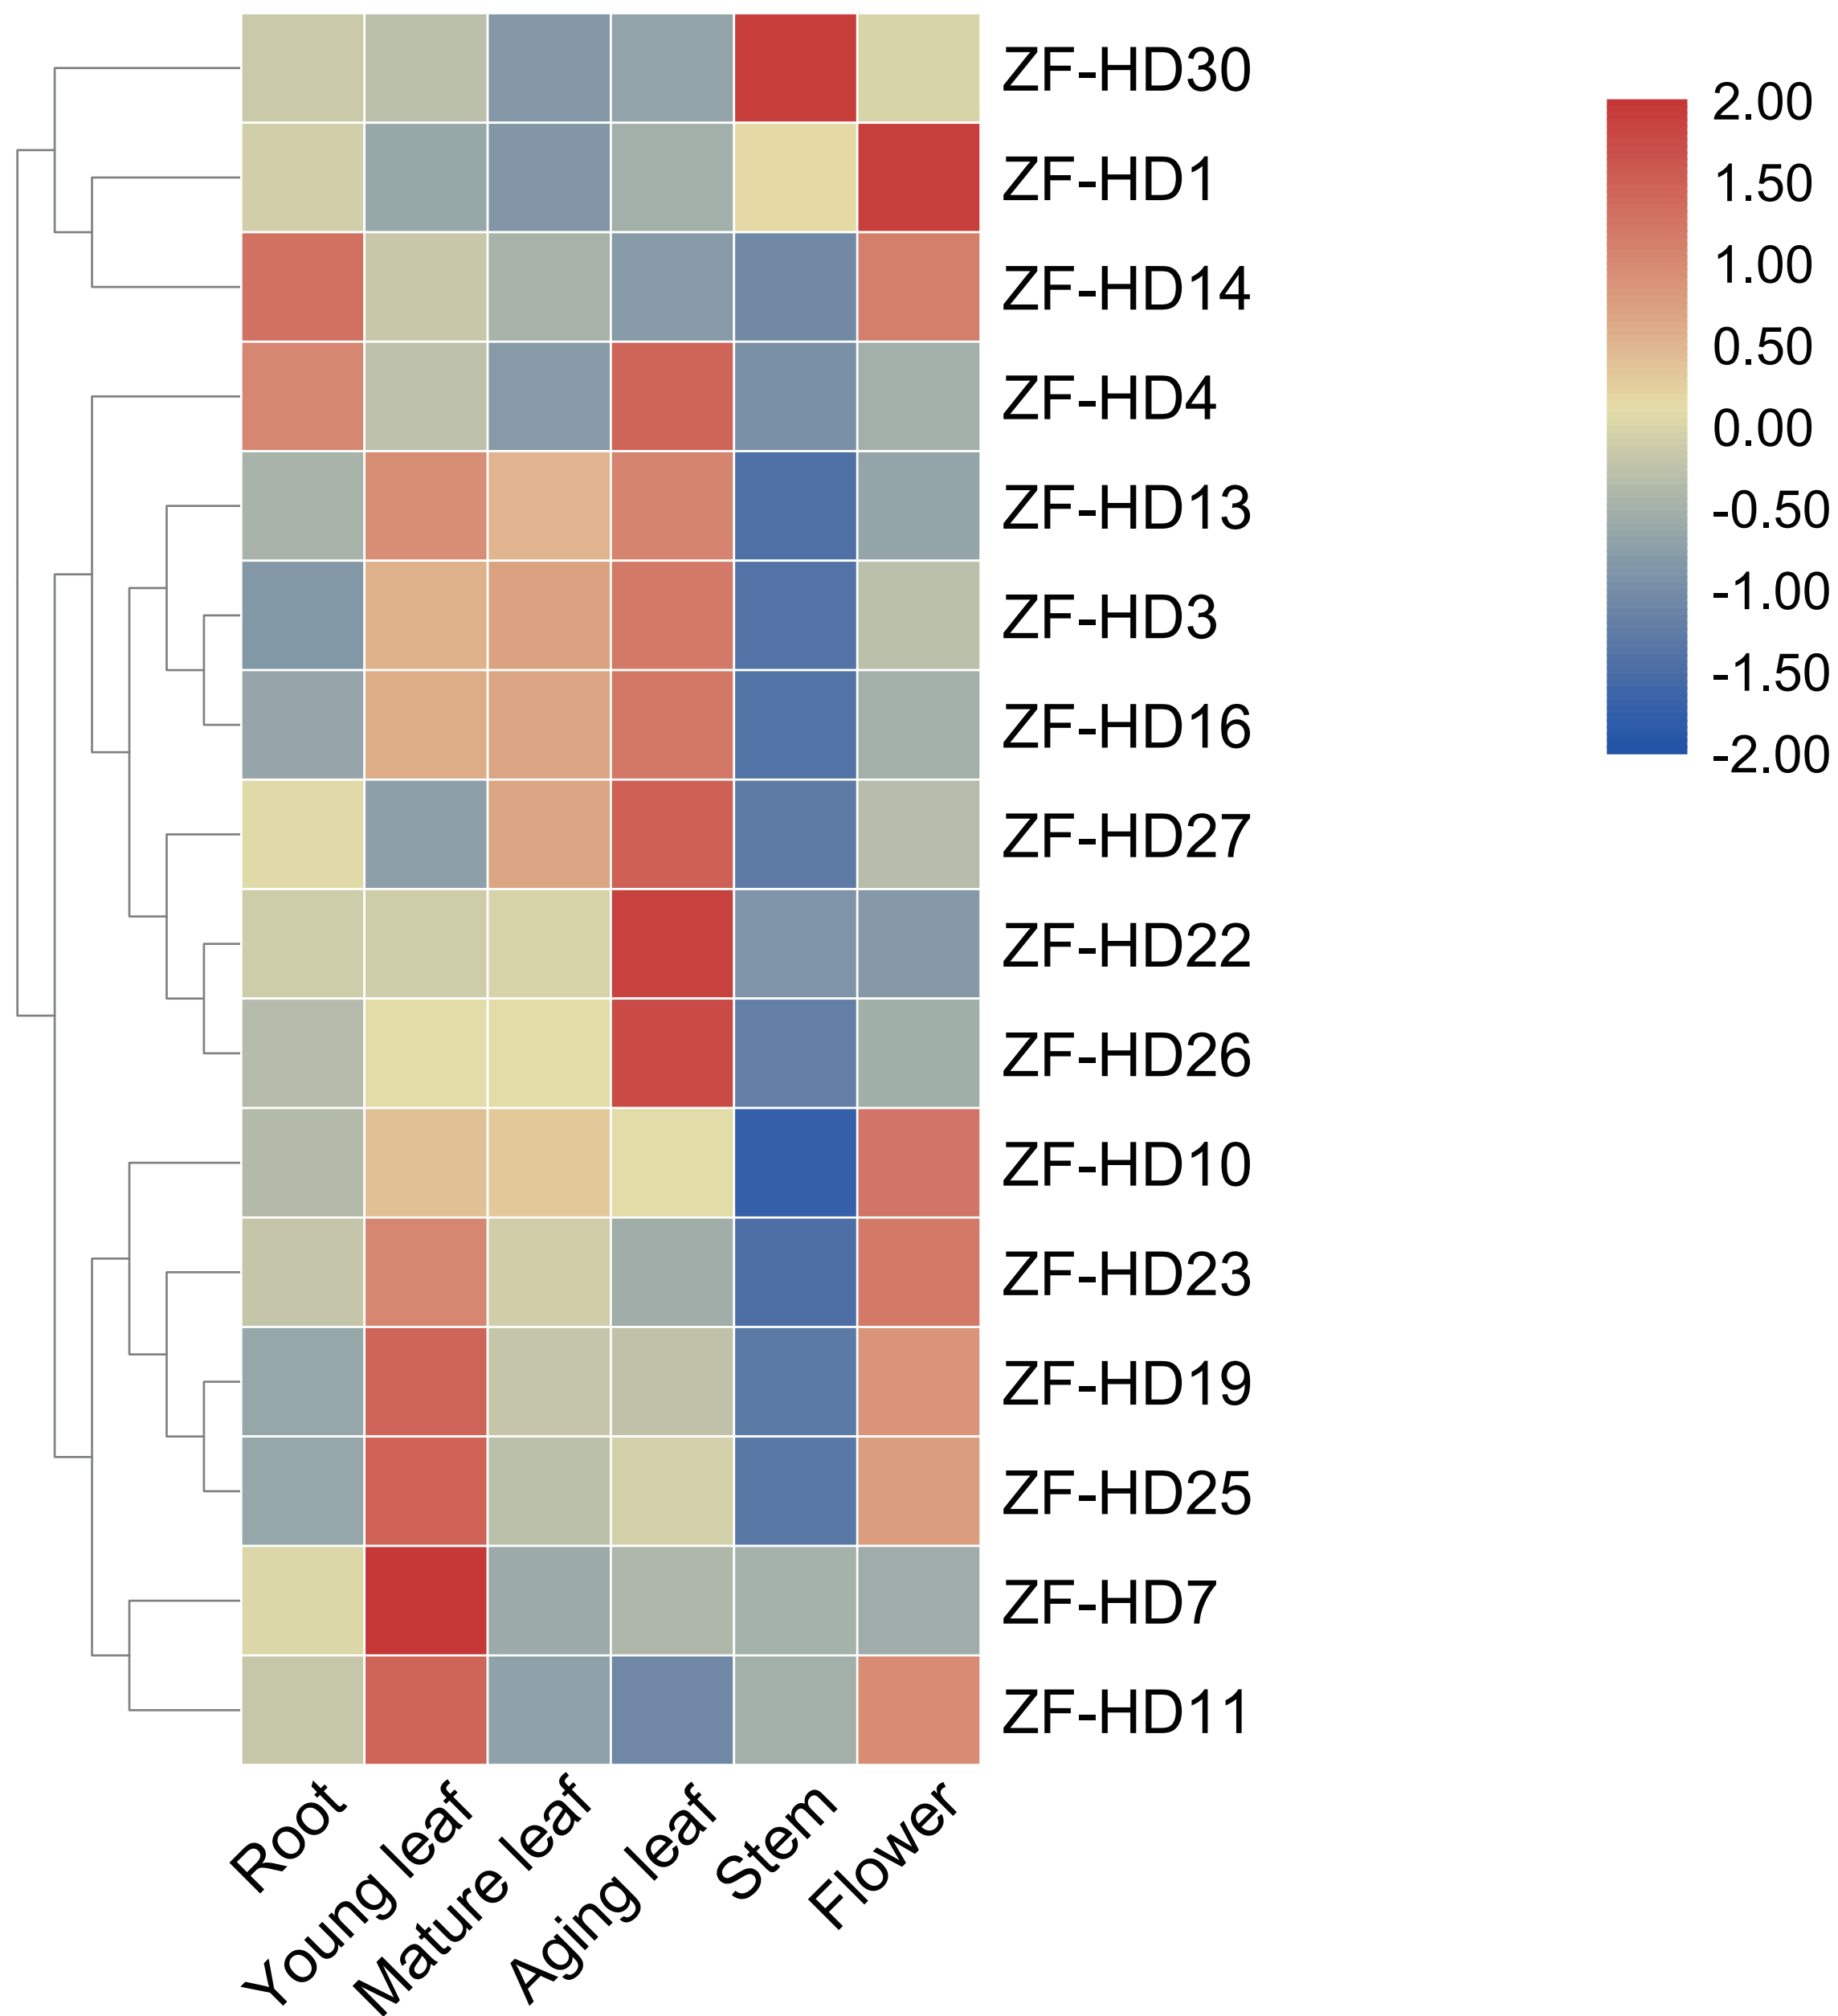

Supplementary Figure S2. The expression pattern of the selected NtZF-HD genes in different tissues. Red: positively correlated; Blue: negatively correlated.
