# Supplementary material
Source: MDPI journal article supplement (https://www.mdpi.com/2073-4395/11/3/406)
Supplement: s1 [file s1]

Table S2. The RT-qPCR primers of NtZF-HD genes

| Primer Name | The sequence of RT-qPCR primers | Primer Name | The sequence of RT-qPCR primers |
|-------------|---------------------------------|-------------|---------------------------------|
| NtZF-HD1-F  | ATCGTAACTTCCACCGTAAAGT          | NtZF-HD16-F | ATAAGGTTTGGCTTCTAACGGA          |
| NtZF-HD1-R  | ATCCTAATTTCTCCGCAAATGC          | NtZF-HD16-R | TTTTCGTCTGGACACGTTACTA          |
| NtZF-HD3-F  | AAGAGGAAGCTATGGTTCAACA          | NtZF-HD18-F | TTTGTCTGAGAAAGTTGGATGG          |
| NtZF-HD3-R  | GTTTTTCTTGGCAAGATTGTGC          | NtZF-HD18-R | GTTTTTCTTGGCAAGATTGTGC          |
| NtZF-HD4-F  | GGTGACTTACAAGGAATGCTTG          | NtZF-HD19-F | GACAAAGTTCACACAAGACCAA          |
| NtZF-HD4-R  | CATTTTAGCGAAGTGGGATCAG          | NtZF-HD19-R | AAGAGTGTTCTTGTTATTGCGC          |
| NtZF-HD6-F  | CCAGCATTGGTGGTAATGTTAC          | NtZF-HD21-F | ATAGGTGGACAAGCTGTAGATG          |
| NtZF-HD6-R  | GCAATTACAAGCAGCACATTTTC         | NtZF-HD21-R | TTCTGTGACAATTACAAGCAGC          |
| NtZF-HD7-F  | TCGTCGTA CTACAGAAGCTTAC         | NtZF-HD22-F | GAGGACGAATTACAAACAGCTG          |
| NtZF-HD7-R  | CTCATCTTCCCTTTGAATTCGC          | NtZF-HD22-R | ACATGTTCAAGATCTTCACTCGA         |
| NtZF-HD11-F | AAGTGGAAGCTGATGTTGCTTC          | NtZF-HD23-F | ATTCGACTTTGCTTCTTTCACC          |
| NtZF-HD11-R | AGCAACACAGCTTCTTTAACTG          | NtZF-HD23-R | AGTACTTTCACCAGCAGTAGTC          |
| NtZF-HD12-F | TCAACTTTGCAGAGAAAGTTGG          | NtZF-HD24-F | CTTCCACAGAAAAATGGAGGTG          |
| NtZF-HD12-R | GAGTTTTTCTTGGCAAGACTGT          | NtZF-HD24-R | GAGGATGAATTCTTGACCGTTG          |
| NtZF-HD13-F | CGAGCAAGATATCGTGAATGTC          | NtZF-HD25-F | CTCTCTAGCCGAATCCTTTAGG          |
| NtZF-HD13-R | GCAATTACAAGCAGCACATTTTC         | NtZF-HD25-R | GGTGGTAGTTTTGCAAATGTCT          |
| NtZF-HD14-F | TCTAAAAAGCACGGTCACTACT          | NtZF-HD26-F | TGAATCATCGAGTGAGGATCTG          |
| NtZF-HD14-R | GGTGCAATGGCTGATTATTCAT          | NtZF-HD26-R | TGTTGTTGAGTGAATTCGTCC           |
| NtZF-HD30-F | ACAAAGAGTGTCTCAAGAACCA          | NtZF-HD30-R | CATTTGAGAGCGTCAAGAGAAC          |
| L25-F       | AGGATGCCGTGAAGAAGATGTA          | L25-R       | AGGCTTGCTATGGAAAGAAGAG          |
