# Supplementary material
Source: MDPI journal article supplement (https://www.mdpi.com/2073-4395/11/3/406)
Supplement: s1 [file s1]

Table S1. The ZF-HD protein sequences of *Arabidopsis*, tomato and tobacco

| Gene name | Accession number        | Putative protein sequences                                                                                                                                                                                                                                                                                                                                                                                                                                                                                                                                                                                                                                                                                                                                                                                                                                                                                                                 |
|-----------|-------------------------|--------------------------------------------------------------------------------------------------------------------------------------------------------------------------------------------------------------------------------------------------------------------------------------------------------------------------------------------------------------------------------------------------------------------------------------------------------------------------------------------------------------------------------------------------------------------------------------------------------------------------------------------------------------------------------------------------------------------------------------------------------------------------------------------------------------------------------------------------------------------------------------------------------------------------------------------|
| NtZF-HD1  | Nitab4.5_0003309g0010.1 | MQGDKANDNIYRECLRNHAASLGSYATDGCGEFTLDDNNNNNTSPRSASLHCAACGCHRNFHRKVMYGASYSNNSSRDREIVA AELTDYGGGRMSAALTAESPRSGKKRFRTKFTTDQKEKMLAFAEKLGWTL                                                                                                                                                                                                                                                                                                                                                                                                                                                                                                                                                                                                                                                                                                                                                                                                     |
|           |                         | QRKDQENETERFCREVGVSRKVFKVWMHNHNNTSSVSTGNASSLTQ                                                                                                                                                                                                                                                                                                                                                                                                                                                                                                                                                                                                                                                                                                                                                                                                                                                                                             |
| NtZF-HD2  | Nitab4.5_0001418g0030.1 | MYWDAAAAKCRLTMVGKFFKRKPKMTAIRASFSAKYPLKDHVKIVSFDSLHVFLDFTNEEDYDAIFFKETIIVAGA QMEVFRWTPEFHVFHGYHVMQTKMKPDNHTAKVEGRDETLGIMELDKNEHIGGGNEYGS                                                                                                                                                                                                                                                                                                                                                                                                                                                                                                                                                                                                                                                                                                                                                                                                   |
|           |                         | KESEAAPKNTHILEDGLYISDSVDCVPEATHSDSAERV ASPVNCSTATSEIQASAETSCSGSSGLSFASDGIAGGIPSVMDSSSMCSTDMSFRGTYSNHNQKLYGRGWKYGSKSTSNAADWASEKLNQPLDALPIGE<br>HHEDRKSRPPIQVQYSTYRGRQAVTFPENYWESLVPDCKLTLLIGNFFQRKPRMKEIRADFIKNPLKGQVKITHYTSQQVSLDFTNEADYDTVLSKKTLTVAVMQISWWSRDIHHEVVSTLNPQKQEWKAMDKERD<br>VKPGIMEQQKTELDELIGGETEYKIDAPEAVLETDPDILGEVSDVSNLHIVPEVAHPDFRDNDASPVNCDTDTSKMHPSIGITCCQLSGISAPQN MIDGTSPYVMNVNSSKCTYSILSIVTTGLSSNDKDQSKSIRDVAV<br>SHQSELTESDRERHSSEIPSVSSPPRSPRSIGSVIQLMSKLVSVTNDPNSVKRSTSDNSNLTQKSVPLFNSAENAVLLSVDPHKSIIEPKAIEKPLVRSISITTENFPSNQVTASATAEMPMPLLPTLPLLAHVS PAAQLCA<br>DPPTAIDTYVPQSYPNGIVGSHIFGRSEQAGSGSIFPSQALHQHSLAQHRSQNLNSYKVDKNAHLQESNMIA GPTQLQSLTTSVSDTTSIRYMECLKNHAASMGGAIDGCGEFMPSGGEGTPGALKCEACNCHR<br>NFHRKKIINHRQMAGIGSHIEPRNNSNSRNIHKQSPISQQYQHNYSYSPSSVNNSSDYPQLPLPISGQICLPQGLERKEPSLIRPSYSYEMVNHDTVQQWEYFWRDRSRNTSIDHPSLRNENQNFDMFKPLNYRTSDNIPS<br>EFANEFPHLDIINNRLRYDEHGKGRTLMPNSGFQNLNNGSYHLNGHFT |
| NtZF-HD3  | Nitab4.5_0006178g0010.1 | MEVPNEEGEMAMPINSAYGHGHMIIHDPAPQNNHIIPSSQIITSKNGPPISSNKKMMKYKECLENHAAAMG GNATDGCGEFMPSGEEGTFEFLTCSVCNCHRNFHRKETEGELVRKVYVGHPhKAFVYPASRAAPHQ<br>MIMSYNNHMG SIPGINQEDGIINGCGV MARPLNYQQLVKKRFRTKFSQE QKEKMLNFAEKIGWKMQQEEAMVQQFCQQVGVKRRLK VWMHNLAKKNSNDINTESQV                                                                                                                                                                                                                                                                                                                                                                                                                                                                                                                                                                                                                                                                               |
| NtZF-HD4  | Nitab4.5_0000014g0020.1 | MDSTYSIPTRNHIPTKTPDSEKDFPPYPQVPLKPLSFTNVTSSKHHQVHNHQPPSAAVTYKECLKNHAASIGGYTV DGCGEFIPTDAIAADPTSLKCDVCGCHRNFHRERDDDFMDFRHHHAQVATPATPTALKPEK<br>PRRRRRFR TKFSQE QKNRMYSFSEKLGWKLQKCD EAMVEEFCNEIGVGKG VFRVWMHNNKSTLGKKGF PKCQQYQTVPYNNKQ                                                                                                                                                                                                                                                                                                                                                                                                                                                                                                                                                                                                                                                                                                     |
| NtZF-HD5  | Nitab4.5_0001507g0130.1 | MEFDEEHEE QEEEIGNIHQISSAAATVNYQTQGNNSVRGVEEGVSTTVRKSSVRYRECLKNHAVGIGGHA VDGC GDFMPAGEEGTMDALKCAACNCHRN FHRKEVEGEVFHHTPPPHLTHHHQP HHSHPHFSPY<br>TSYRTPHHPSGYLHVTTPSHQRPLALPSTSEDEDMSNPSSSGGGGNGGVGGSSRKRFR TKFTADQKDKMLAFAERL GWRMQQDEALVQQFCAETNVQRHVFKVWMHNNKHTLGKKP                                                                                                                                                                                                                                                                                                                                                                                                                                                                                                                                                                                                                                                                      |
| NtZF-HD6  | Nitab4.5_0002224g0080.1 | MALAGEDKEMRMQGS LGYHSLDQNLDAQPVV PYSGGSTNNKFKITSRARYRECLKNHAASIGGNVTDGC GEFMPCGEEGTLEALKCAACNCHRN FHRKEQHV GADNNNNAGIMVVHPLQLPQLPSPLPSMNH<br>HHQHGRSVWSTMPQPVKMAFRGSGGGGSGATDSSEELNFNTYQQATSVPPQPQPPFVLAKKRFR TKFTQDQKEKMLEFAEKLGWRI PREDDTEVQRFC SQVGVKRVFKVWLHNNKNPSAKKNPQEEP                                                                                                                                                                                                                                                                                                                                                                                                                                                                                                                                                                                                                                                            |
| NtZF-HD7  | Nitab4.5_0001122g0170.1 | MDFENHQEEEE TEPPRHDSDLNDSNSTHTKMPSP TMELEPLAVVHTWHNNPKPKYKECLKNHAVSIGGHA VDGC GEFM PAGEDGSLDSLKCAACNCHRN FHRKITQPPN AVEPLPFVNYHSSYYRSLPPPCGYL<br>QYHVAPQQRPLALPSTSGGGGYWEDQEDMSNLNNSGGSGSKKRFR TKFSQE QKEKMQELADKL GWRIQREDEELVQQLCNETGVRRQVFKVWMHNNKNTLGKKP                                                                                                                                                                                                                                                                                                                                                                                                                                                                                                                                                                                                                                                                               |
| NtZF-HD8  | Nitab4.5_0002472g0040.1 | MDSTCSIPTPTIPTKTQVPLIKPLSFTNVTSSKHHQVHNHQPPSAVVTYKECLKNHAASIGGHTVDGC GEFI PPSATAADPTSLKCDVCGCHRN FHRREPDDDFMDIRHHHAQVATPATPTALKPENPRRRRRFR TKF<br>SQEQKNKMYSFSEKL GWRLQKCD EAKVDFECNEIGVGKG VFRVWMHNNKSTLGKKDFQ NANNSTRPYPTTNSKR                                                                                                                                                                                                                                                                                                                                                                                                                                                                                                                                                                                                                                                                                                           |
| NtZF-HD9  | Nitab4.5_0000136g0410.1 | MEQKGQEKEMGIPNSIGYNPSSNTRRNEKAGSGNVILS PIQTLNQHNQHS LQHSQNLNSHQLEERDPLVAATNRAQLRQLSTTSGNGTITTTTTTTTTSSSVVRRYRECLKNHAASMGGHILDGC GEFMPEEEEGALK                                                                                                                                                                                                                                                                                                                                                                                                                                                                                                                                                                                                                                                                                                                                                                                              |

|           |                         |                                                                                                                                                                                                                                                                                                                                                                   |
|-----------|-------------------------|-------------------------------------------------------------------------------------------------------------------------------------------------------------------------------------------------------------------------------------------------------------------------------------------------------------------------------------------------------------------|
|           |                         | CAACNCHRNFRRETFSEAEQIARPHPPYSTCNPPIHSSSYHYNYSTASVMMTFGRNAESSSEDNLNFSNVGGGQSSKSKKRFRTKFTAQKERMHEFAEKVGSIQKQDEQELQHFCNQVGVKRQVFRIWMH<br>NSKQANKKRQM                                                                                                                                                                                                                 |
| NiZF-HD10 | Nitab4.5_0000274g0220.1 | MDLTNNSTTTTTTLANTTTITTTSAHIKIPAEIETPTQIQKPKPFSFSGVLKRKNLQHHHPVVIYKECLKNHAASLGGHAVDGCGEFMPSPPTANPADPTSLKCAACGCHRNFRREPEEPVVIPPPPIATAALEYQPH<br>HRHHPPPPPLPRGDHSSPNSPPPISSAYYPASAPHMLLALSAGFSGEKNHNPISSPVVNTTNCNGRKRFRTKFTPDQKVKMLEFAERVGWKMQRDEDLVRSFCNQIGIEKGVLVWMHNNKNTFGKKLDQHHL<br>ADININNNGNSTNVVNGFCIVSRNNNSHHHNSTDSEFHHLHHHESSNDNKKISDHIKSVGTANVVVATNGSSSSS |
| NiZF-HD11 | Nitab4.5_0000564g0050.1 | MKKVLRKSSNDSSHNSTNSTFTVRTVRYVEQKNHSASVGGYVIDGCREFMGETSGAALTCACGCHRNFRKEVETDVASDYMMHFAPNKSYFNLVTEPVKEAVLLEGLIGQDKVRPVEEWGRKANVKKVS<br>VKSMNVLKPHSRLFFEHHFLFVPD                                                                                                                                                                                                     |
| NiZF-HD12 | Nitab4.5_0003247g0060.1 | MELPIQEEEMPMPINSTYVGGGEGHGHGHHHDPTVPNNTNHIIPSSFMPSGEEGTIEALICSACNCHRNFRKEMEGEQQLQLPPSSCDYYNLNRGGKKVYLGHSNHHKGLLGPEPFGTIIPSRAAAPHHHQMIM<br>SYNNMGSLPSESEEHEDINGGGGVMMAMAMARPLHHHNQIVKKRFRTKFTQEQQEKMFNFAEKVGWQIQKQEETVVQQFCQELGIKRRVLKVVWMHNNKHSLAKKNSNSTIPQNQV                                                                                                    |
| NiZF-HD13 | Nitab4.5_0001759g0020.1 | MALAGEDKEMRMQGSGLGYHSLDQGNQHHHQPNNNNLQPQQDNEKSSSGGTGAAPPVVVPYSSGGSTNNKFITSRARYRECLKNHAASIGGNVTDGCGEFMPSGEEGTLEALKCAACNCHRNFRKEQPNVDNN<br>NAGIMVVHPLQLPQLPSPLSMNHHQHGRSVWSTMPPQPVKMAFGGSGGGSGATDSSSEELNFNTYQQATSVPPQPQPPFMLAKKRFRTKFTQDQKEKMLEFAEKLGWIRPREDDTEVQRFCSQVGVKRQVFK<br>VWMHNNKNPSAKKNPQEEP                                                              |
| NiZF-HD14 | Nitab4.5_0000948g0160.1 | MASNSSSTPTMITYGECLKNHKKKHGHYLFDCREFVKSGEDGTKGSYVCANCGCIRSFRHMNNQPLHRHQAIRLCFFHHCVIPNGMQPIHFHFNETQVSVSATSLPVTIISDPESVSVQENVSCVMTPPMLPLPLF<br>PKDEMGVPVPLPLFPETPSSGTFGLLKGGQDMDMD                                                                                                                                                                                   |
| NiZF-HD15 | Nitab4.5_0000948g0180.1 | MATNNKHFLVKYGECKHNYAASAMGYALDGCGEFCPNGIPESLICAACHCHRSFHRKMEMEIPVLSKSHHNHGTSLVIVVPTPSQQQSRIHPRQTYDKNNGAETTEMGGGEIEVVEQINTKGKRINSEQKERVKAF<br>AEKIGWRWTKYNEEVKPFCAEIGITPYFLKNWIDNRRRFGPKKTI                                                                                                                                                                         |
| NiZF-HD16 | Nitab4.5_0000948g0190.1 | MANNMMLRANQAARANNRPMISPAVYGEICIRNRLTGAMTYDTDGCLAFAPGSTQALRCQTCGCSRTFHRRLDTGNLPPPVASHQIYDDTRLVYSTPPVFAAPSSSTIIPPPPLPLPTQPDAPAADAHMENSANANSL<br>AESFRVTAVENTSTGSVNVQCVDHPVAVTRGSVKGKEVMDAEIAKTFTSLPPLPRRQSRKSPAVSGKRKSTISSDVVSEIMKDKVWLLTEELEWLNMKNKEEDKKNNNTNKQLEETNSNVSRKPIVDHTIERWM<br>NNRAEVLKTMNHQFLVIATTLTARRELGDQSSCFGTSNTELENDESSSDSDS                      |
| NiZF-HD17 | Nitab4.5_0000460g0070.1 | MEVPNEEGEMAMPINSTYGHEHMIYHDTAPQNNHIITPPQIVTSKNGPISTSTLETSDNVVPYKKMVKYKECLKNHAAAMGGNATDGCGEFMPSGEEGTFEFLTCSVCNCHRNFRKETEDELIRKVYVGHPHKAF<br>VYPASRAAPYQMIMSYNNHLGSFPYIEQEDGIINGCGVMARPLNYQQLVKKRFRTKFSQEQQEKMMLNFAEKIGWKMQKQEDAMVQQFCQEVGVKRRVLKVVWMHNNKHSLAKKNSNDINLQSQI                                                                                          |
| NiZF-HD18 | Nitab4.5_0005164g0020.1 | MEIPSQEEEMPMPINSTYVGGGGHGHGHHHDPTVPNNTNHIIPSSNHAAAMGGNATDGCGEFMPSGEEGTIEALICSACNCHRNFRKEIEGEQQLQLQPPSSCDYYNLNRGGKKVYLGHSNHHKSLLGPEQ<br>YGTIIPSRATAPHHHQMIMSYNNMGSLPSESEEHEDINGGGVMAMAMARPLHHHNQMVKKRFRTKFTQEQQEKMFNFAEKVGWQIQKQEETVVQQFCQELGIKRRVLKVVWMHNNKHNLAKKNSNVTIPQNQV                                                                                      |
| NiZF-HD19 | Nitab4.5_0003597g0010.1 | MEFDEEHEDQEEEIANIPQIPTENNYQELGEGGPISQAAATLRKNNVIPRYRECLKNHAVGIGGQAVDGCGEFLPSGEEGTLDALKCAACNCHRNFRKEVEGEILNFHHPTPPPILHHPHHYPIRYHQRPLALPSI<br>SSREDIEEYVSNPSSSGSGSRKRFRTKFTQDQKEKMFAFAEGLGWRIQKENEAAVQQFAETNIRRVQVKVWMRNNKNTLGKKP                                                                                                                                   |
| NiZF-HD20 | Nitab4.5_0005738g0020.1 | MVGKFFKRKPKMTAIRASFSAKYPLKGQVKVVSYSLSLVFLDFTNEDDYVAVLFKERIIVAGAQMECAGKLLVDNLLSSKTKMKPDNHTAKEEGRDETLMELDKKEHIGGQNEYGAAPKNTHIEDGLYISDS                                                                                                                                                                                                                              |

|           |                         |                                                                                                                                                                                                                                                                                                                                                                                                                                                                                                                                                                                                                                                                                                                                                                                                                                                                                                                                                                                                                                                                                                                                                                                                                                                                                                                                                                                                                                                                                                                                                                                                                                                                                                                                                                                                                                                                                                                                                                                                                                                                                                                                                                                                                                                                                                                                                                                                                                                                                                                                                                                                                                                                                                                                                                                                                                                                                                                                                                                    |
|-----------|-------------------------|------------------------------------------------------------------------------------------------------------------------------------------------------------------------------------------------------------------------------------------------------------------------------------------------------------------------------------------------------------------------------------------------------------------------------------------------------------------------------------------------------------------------------------------------------------------------------------------------------------------------------------------------------------------------------------------------------------------------------------------------------------------------------------------------------------------------------------------------------------------------------------------------------------------------------------------------------------------------------------------------------------------------------------------------------------------------------------------------------------------------------------------------------------------------------------------------------------------------------------------------------------------------------------------------------------------------------------------------------------------------------------------------------------------------------------------------------------------------------------------------------------------------------------------------------------------------------------------------------------------------------------------------------------------------------------------------------------------------------------------------------------------------------------------------------------------------------------------------------------------------------------------------------------------------------------------------------------------------------------------------------------------------------------------------------------------------------------------------------------------------------------------------------------------------------------------------------------------------------------------------------------------------------------------------------------------------------------------------------------------------------------------------------------------------------------------------------------------------------------------------------------------------------------------------------------------------------------------------------------------------------------------------------------------------------------------------------------------------------------------------------------------------------------------------------------------------------------------------------------------------------------------------------------------------------------------------------------------------------------|
|           |                         | VDCVPEATHSDSEERVASPVNCSTETSEIHASAEATSCSGISGLSFASDGLAERIPSDMDDSSSMCSTESVSFRETYSNHNSQKSYGRGWKYGSKSTSTAADLACATLNQPLDALTIGECHEDRKSKPLIQVQYSTYRGRQ<br>AITFPETTVKALSPILSLIGNFFQRKPRIKEIRADFIANKPLKGQVKITHYTSQQVSLDFTNEADYDTVLSKKT LIVAGAVMQISWWSRDIHHEVVSALNPVLGKQEQAAMDKERGMELQKTERDELIGENEYKTEA<br>AEAVLEKPDILEEVS DVNSLHVVEVAHPDFGSDASPVNCDTGT SKMHP SIGTTCRLSGLSAPQNMIDGTSPYVMNVNSSTCSTYTIPPVTTGLSSNHKDQSKSTSDVADSASKAHSQLLDDLPDARQQVLKKE<br>VAISHRSELTEADREKPSLEMPSVSSPRNPPRSIGSAIQSMSKLVSVKNDLISVKRSISDNFNLTKQSVPLFNSAETA VLLNADPHKALEPKDMENPLVQSVAITSENFLSHQVTAPATAEKPMAVEAPFPALAKRWIST<br>PLLSSITSSIRIKDMHLDREPNMTLGPTQLQPPSTTSVRDITTSIRYGECLKNHAASMGHVAVDGCGEFMPSEGQGTGALKCAACNCHRNHFHKEIVNHRQMAGVGS HIEPRN SSSGYIHNQAPISQQYQHNSVFTL<br>QIHILNYLYRSLARYVFHRAWKE<br>MEFDEEHEDQEDEIANISQIPATTENNYQEFGE GGPISQAAATLRKNNVPSPRYRECLKNHAVGIGGQAVDGCGEFLPAGEEGTLDALKCAACNCHRNFRHKEVEGEILNFHHTTPPILHHPAHHPYRYLQRPLALP<br>SVSSREDIEDYVSNTSSGGGGSGSRKRFRFTKFTQDQKEKMF AFAEGLGWRIQKENDAAVQQFCAETNIRRQVFKVWMHNNKHTLGKKP<br>MEHTGQDKDMGMPNCIGFNSSHLNQESTPFAAAKLPTAPIVSSLPDRTRNEQISHGNTIFSPNQTL DHQHNLTPNSDPDPTIIAAQLRQQSTTSASDRNSSIRYKECLKNHAASLGGHVL DGCGEFMPSGEETPEYLK<br>CAACDCHRNFRHKEDELEQTAGVYRNNSNSHRVHIQTPPSLPVPPQQHHHKYSHNYSRGMPPPVMMNFGGNTGVPAESSSED LNMFHSNAGGQGV IQPCAFSVSKKRFRFTKFTQQQKEKMQEFAEKL EWRIQK<br>QDEQEVQQFCNEVG VKRQVFKVFMHNCKQAIKRKQT<br>MASNSSSTPIRYGECLKNH SKRHGY YLFDGCREFVKSGEDGTKGSYICANCGCIRSFHRMNNLPLHRHQAIRLCFFHHCVIPNGMQPIFHPMTTAGESTQVS VSAASLPVTIISNPESVSVQENVPYVMT PPMPLPLLPLF<br>PKDEMGPVPLPLPLFPETPSSAEQN<br>MASNSKHFLVKQKYECKHNYAASTMGYALDGCREFCPNGAPESLICAPCLCHRSFHRKMEVELPILSNTHHRHGTSLVIVVPPTPTSQQRSRIHPHKYDENNNVAATSPPQGAETTEMGGGEIEVVEQMSIKRKRI<br>NSEQKERVKAFAEKIGWRRWTKYNKEVKTFCAEIGITPYFLKNWIDNNRRRFGPKKTI<br>MANNNMLRANQAARANNRPMISPAVYGE CIRSRLTGAMTYDTDGCLAFAPGGPPGST EALCCQTCGCSRSFHRRLDTSNLLPVASHQIYDDTRLVYSPPVFTAPSSTIIPPPPPPRTPQPDAPAADVNM EFSNANANS<br>LAESFRVTAVENISTGSVNLQCVHSPVSATRGSVKGKEVMDAEIAKTFAKLPLPPRQQRSKSPAVSGKRKSTVSSSDV VSEIMKDKVWLLTEELEWLN MKNKEEDKKNNNKQLEETNSNEARRKPIVDHTIDRLMS<br>NRAEVLKTMNHQFLVIATTLTARRELGDQSPCSGTSNSTESESENDESSSDSDSDS<br>MEHTGQDKDMGMPNSIGFNSSHLNQESTPFAAAKLPTAPIVSSLPDRTRNEQISHGNTIFSPNQTL DHQHNLTPNSDPDPTVIAVQLRQQSTTSASDKNSSVRYKECLKNHAASMGHVL DGCGEFMPSGEETPEY<br>LKCAACDCHRNFRHKEDESEQTAGVHRNNSNSHRIHAQIPPSLPAPPQQQHYHKYTHGYSRGMPPPVMMNFGGNSG VPAESSSED LNMFNSNAGGQGV IQPCTFSASKKRFRFTKFTQQQKEKMQEFAEKL GWRIQ<br>KQDEQEVQQFCNEVG VKRQVFKVFMHNCKQAIKRKQT<br>MDLTNNTSTTTTTPTLTNTTTTTSAHIKTPEAEIETPTIQIKPKPFSFNGVLKRKNL FQHHPV VVIYKECLKNHAASLGGHAVDGCGEFMPSP TANPADPTSLKCAACGCHRNFRHREPEEPVIPPPPIATAALE<br>YQPHHRHHPPPPPPLPRGDHSSPNSPSPPISSA YYPASAPHMLLALSAGFSGEKNHNPISSPVVNTTNSNGRKRFRFTKFTPDQKV KMLEFAERVGWKMQRDEDLVRFCNEIGVEKGVLK VWMHNNKNTFGKKL<br>DQHHLADINNNNGNSTNVVNGFCIVSRNNNSHHHNSTDSAEFHLHHHESSNDNKIIDHIKSVSTANV VVG TNGSSSSS<br>MKKVLRKSSKSSNNSTNSSSFTVRTVRYVEQKNHAASVGGYVVDGCREFM PGATAGAALTCAACGCHRNFRHKEVETVKKAMLLERP WIDQDKVRPVEVWGRKTDVNKVTVKSMNSLKPHSRLFFEFHHFL<br>FVPD |
| NtZF-HD21 | Nitab4.5_0002025g0010.1 |                                                                                                                                                                                                                                                                                                                                                                                                                                                                                                                                                                                                                                                                                                                                                                                                                                                                                                                                                                                                                                                                                                                                                                                                                                                                                                                                                                                                                                                                                                                                                                                                                                                                                                                                                                                                                                                                                                                                                                                                                                                                                                                                                                                                                                                                                                                                                                                                                                                                                                                                                                                                                                                                                                                                                                                                                                                                                                                                                                                    |
| NtZF-HD22 | Nitab4.5_0001960g0020.1 |                                                                                                                                                                                                                                                                                                                                                                                                                                                                                                                                                                                                                                                                                                                                                                                                                                                                                                                                                                                                                                                                                                                                                                                                                                                                                                                                                                                                                                                                                                                                                                                                                                                                                                                                                                                                                                                                                                                                                                                                                                                                                                                                                                                                                                                                                                                                                                                                                                                                                                                                                                                                                                                                                                                                                                                                                                                                                                                                                                                    |
| NtZF-HD23 | Nitab4.5_0002698g0010.1 |                                                                                                                                                                                                                                                                                                                                                                                                                                                                                                                                                                                                                                                                                                                                                                                                                                                                                                                                                                                                                                                                                                                                                                                                                                                                                                                                                                                                                                                                                                                                                                                                                                                                                                                                                                                                                                                                                                                                                                                                                                                                                                                                                                                                                                                                                                                                                                                                                                                                                                                                                                                                                                                                                                                                                                                                                                                                                                                                                                                    |
| NtZF-HD24 | Nitab4.5_0002698g0080.1 |                                                                                                                                                                                                                                                                                                                                                                                                                                                                                                                                                                                                                                                                                                                                                                                                                                                                                                                                                                                                                                                                                                                                                                                                                                                                                                                                                                                                                                                                                                                                                                                                                                                                                                                                                                                                                                                                                                                                                                                                                                                                                                                                                                                                                                                                                                                                                                                                                                                                                                                                                                                                                                                                                                                                                                                                                                                                                                                                                                                    |
| NtZF-HD25 | Nitab4.5_0002698g0100.1 |                                                                                                                                                                                                                                                                                                                                                                                                                                                                                                                                                                                                                                                                                                                                                                                                                                                                                                                                                                                                                                                                                                                                                                                                                                                                                                                                                                                                                                                                                                                                                                                                                                                                                                                                                                                                                                                                                                                                                                                                                                                                                                                                                                                                                                                                                                                                                                                                                                                                                                                                                                                                                                                                                                                                                                                                                                                                                                                                                                                    |
| NtZF-HD26 | Nitab4.5_0018250g0010.1 |                                                                                                                                                                                                                                                                                                                                                                                                                                                                                                                                                                                                                                                                                                                                                                                                                                                                                                                                                                                                                                                                                                                                                                                                                                                                                                                                                                                                                                                                                                                                                                                                                                                                                                                                                                                                                                                                                                                                                                                                                                                                                                                                                                                                                                                                                                                                                                                                                                                                                                                                                                                                                                                                                                                                                                                                                                                                                                                                                                                    |
| NtZF-HD27 | Nitab4.5_0004308g0050.1 |                                                                                                                                                                                                                                                                                                                                                                                                                                                                                                                                                                                                                                                                                                                                                                                                                                                                                                                                                                                                                                                                                                                                                                                                                                                                                                                                                                                                                                                                                                                                                                                                                                                                                                                                                                                                                                                                                                                                                                                                                                                                                                                                                                                                                                                                                                                                                                                                                                                                                                                                                                                                                                                                                                                                                                                                                                                                                                                                                                                    |
| NtZF-HD28 | Nitab4.5_0008383g0010.1 |                                                                                                                                                                                                                                                                                                                                                                                                                                                                                                                                                                                                                                                                                                                                                                                                                                                                                                                                                                                                                                                                                                                                                                                                                                                                                                                                                                                                                                                                                                                                                                                                                                                                                                                                                                                                                                                                                                                                                                                                                                                                                                                                                                                                                                                                                                                                                                                                                                                                                                                                                                                                                                                                                                                                                                                                                                                                                                                                                                                    |

|           |                                  |                                                                                                                                                                                                                                                                                                                                                                                        |
|-----------|----------------------------------|----------------------------------------------------------------------------------------------------------------------------------------------------------------------------------------------------------------------------------------------------------------------------------------------------------------------------------------------------------------------------------------|
| SIZF-HD1  | Solyc01g014970                   | MANMLRANQGARAICKPKDLIVYRDCNHSVLPSVSVVDSCQAFASGGPIGSMESFQCQFCHCHQNVHRWLDVNNHQIAPPPAQQTVTQRDVKPEVSSNTTNANRLGRINAQIFDSLAVSIELAESIMARATENWVN<br>CNNKDVGNKSKKSWDEHVAEEYEKEQPQILANQLELTLNMRSQNGKNKKIKKDEDEKPDGFELYIKTKSKAIKKLQIAQAENNVFGQSYYPN<br>MELPSQDHEDMPIPINSTYGHLIHHDTPPNNTNHIIPPSMNGPPIDAPPVATAADHHVPFKKIVRYKECLKNHAASMGGNATDGCGEFMPSGEEGTIEALICSACNCHRNFRHRKEVEGDQQQLASSCDFHHVNNRVL |
| SIZF-HD2  | Solyc01g102980                   | GGGSTKKVYLGHNHHKTSLGPEPFGTIIPTRPPHHQMIMSYNMGSLPNSESEEHDIQDHHHIGGIMGMARPLHHVKKRFRFTKFTQEQQDKMLNFAEKVVGWIKQKEEGVVQQFCQEVGVKRRVLKVVWMHNNKHSL<br>AKKNITTNPENQLP                                                                                                                                                                                                                            |
| SIZF-HD3  | Solyc01g103810                   | MASNSSSNPNGDITIKYGICLKNHATKFGDYSVDGCREFVKKGDDGTKEAFICANCGCFRDFHRMNSQSLFRLAIHRSRFIHPHVMPHGGGNAPINFHPMARVMSVQYIRRPVFY                                                                                                                                                                                                                                                                    |
| SIZF-HD4  | <a href="#">Solyc01g103820.1</a> | MASNSSSNSNDDMTIKYGICLKNHATKFGDYSVDGCREFVKKGDDGTKEEFICANCGCFRGFHRMNSQSLFRPPLRSCFIHAHVITHGGGHTG<br>MASNNKKYFLVKYLECRHNYAARSNGYVLDGCGEFCPTGALETLESFICAACHCHRNFRHRKVEVELEDGVESPIISINHPSRGTPLVIIDDPLQYTVKSRAQFCETSKKNNIDVETMKMRDIGEIKVRKLKRKYNASSS                                                                                                                                          |
| SIZF-HD5  | Solyc01g103830                   | KRMRLNPYQRERIWIFANEIMRWKWTKSNEQVIPFCDEIGIAPKFLKNWINNTKSRTPLAKNGHVRNKK                                                                                                                                                                                                                                                                                                                  |
| SIZF-HD6  | Solyc01g103840                   | MASNNKHFLVKYLECRHNYAARSNGYVLDGYGEFCPTGAPETLEFFICAAWHCHQNFHKKVEVEVENKVESPVISINPSHGTC<br>MELTNNNNTTISTITTTTIVKTPEAEIETPTQIQKLKPFPSNGVLKRKSSFNHNHHHPVVVIYRECLKNHAASLGGAHVDGCGEFLPSAANPSDPTSLKCAACGCHRNFRHRREPEEPVIPPPPIATAVLEYQPHHRH                                                                                                                                                      |
| SIZF-HD7  | Solyc02g067310                   | HPPHPPPLQGEHSSPNSPSPPISSAYYPASAPHMLLALSAGFSGEKNQNPTSAPLGHSNGRKRFRFTKFTPDQKVKMQEFAERVGWKMQRDEDLVSNFCNEIGVEKGVLKVWMHNNKNTFGKKSDQPNSGSGDGD<br>NDNDDNHHQNATSA<br>MELNINTNTTAAITTVKTPELAETETPSRIQQPKPFSFNGVLKRKNHHHPVVVYKECLKNHAANLGTHAVDGCGEFLPIAANPADPTSLKCAACGCHRNFRHRREPEEPPIATAAIEYQPHHRHHPPPRGDHGSPN                                                                                  |
| SIZF-HD8  | Solyc02g067320                   | SPSPPISSAYYPASAPHMLLALSAGFSGEKNQNLPTSTTPMAVANSNGRKRFRFTKFTPDQKIKMLEFAEKVEWKMQKRDEDLVNNFCNEIGVEKGVLKVWMHNNKTTSISGKKLDQPNTDNGHNGHNGNSNYTVN<br>GFCIVDRNNTTHHHDNTDSEFHHHESSMNDDNKKENSSFGANNVVVTNGSSSSS                                                                                                                                                                                     |
| SIZF-HD9  | Solyc02g067330                   | MRKIQLFENQDDESVTSESSTNSAFTVRIVRYKECQKNHAARVGGHAVDGCREFMPSGEEGTSSAFICAACGCHRNFRHRREVETEVAASHLSSSSSSSCVLF<br>MEHRGQEKDMGLPNPNPMSYNPSQLNQESSSSAANKFLTAPNRTTNEHENTIFSPNQTLQHNITQNSDPDPVRQLSTSSASERNITPVRYKECLKNHAANLGGYVLDGCGEFMPSGEEETLEYLKCAACDCHRNFRH                                                                                                                                   |
| SIZF-HD10 | Solyc02g085160                   | RKETEDESQTPGVHRNHRIPNQTPPSLPAPVTPQQQHHHKYPHSYPRGHMAPVMMSFSGNTGVAEASSSEDLMNFHGQGQGVQPNCFSASKKRFRFTKFSQQQKDRMLEFAEKLGWRIKQKQDEQEVHQCNEVGVK<br>RQVFKVWMHNSKQATKKKQN                                                                                                                                                                                                                       |
| SIZF-HD11 | Solyc02g087970                   | MKKVLRRNDYSRNSTNSSFTMRRVRYVEQQRNHAASVGGYVIDGREYMPGETTSGTLNCAACGCHRNFRHRREVETDVASECTSASSTTK                                                                                                                                                                                                                                                                                             |
| SIZF-HD12 | Solyc03g061620                   | MTKRHEDDEENDGSLHTSITIRTVRYRECQRNHAAGVGGYAVDGCREFMPSGEEGTPGALSCAACGCHRNFRRREVETEVAASNCSSPS                                                                                                                                                                                                                                                                                              |
| SIZF-HD13 | Solyc03g098060                   | MQGDKSNDIYRECLRNHAASLGSYATDGCGEFTLDDTNTSPGGSTSLNCAACGCHRNFRHRKFCGGSYSNSSRRDREIIAAHDYRLATTEESPAVSERSGKKRFRFTKFTGDQKEKMLAFAEKLGWTLQRKDEENET                                                                                                                                                                                                                                              |

|           |                |                                                                                                                                                                                                                                                                                                                                                                                                                                                                                                                                                                                                                                                                                                                                                                                                                                                                                                                                                                                                    |
|-----------|----------------|----------------------------------------------------------------------------------------------------------------------------------------------------------------------------------------------------------------------------------------------------------------------------------------------------------------------------------------------------------------------------------------------------------------------------------------------------------------------------------------------------------------------------------------------------------------------------------------------------------------------------------------------------------------------------------------------------------------------------------------------------------------------------------------------------------------------------------------------------------------------------------------------------------------------------------------------------------------------------------------------------|
|           |                | ERFCREIGVSRKVFKVWMHNNHKNSSSVSSTVTGNNASSLTQ                                                                                                                                                                                                                                                                                                                                                                                                                                                                                                                                                                                                                                                                                                                                                                                                                                                                                                                                                         |
| SIZF-HD14 | Solyc03g116070 | MMKKRQVVVRRISSGSSTIRNVRYVEQQRNHAANIGGYAVDGCREFMATGDDGTAALTCAACGCHRNFRHREVDGGEVVSESS                                                                                                                                                                                                                                                                                                                                                                                                                                                                                                                                                                                                                                                                                                                                                                                                                                                                                                                |
| SIZF-HD15 | Solyc04g014260 | MEFEDQQKQRDEEIAAAPRHNDSLDNSDLTTKMPPSPQLELEPLTAVQLWTNNPKYKECLKNHAVGIGGHAVDGCGEFLPAGEDGSIDSLKCAACNCHRNFRKIAPPPIAAAAAGVGGEVPVPFVYHSHNQLPTY<br>RTLPPPCGYLQYHVAPNQRPLALPSTSGGYREDQEDISHPNYSGGSKKRFRTKFSQVQKDKMQELADKLGWRIQREDEELVQQLCNETGITRQVFKVWMHNNKHTLGKKP                                                                                                                                                                                                                                                                                                                                                                                                                                                                                                                                                                                                                                                                                                                                          |
| SIZF-HD16 | Solyc04g074990 | MEFDDDDQEEQEIGAVGAENYVTTGNNSGREEGISTSSIGRKSNNVRYRECLKNHAVGIGGHALDGCGEFMPAGEEGTMDALKCAACNCHRNFRHKEAEERLGWRMQKQDEALVQQFCAETNVKRHFVKVWMH<br>NNKHTLGKKP                                                                                                                                                                                                                                                                                                                                                                                                                                                                                                                                                                                                                                                                                                                                                                                                                                                |
| SIZF-HD17 | Solyc04g080490 | MALGGGNEEKEMRISGFQNIDL VSPGGAAPDDIVSAAPHNNSTTGSNKLNGTSTVRGRYRECLKNHAANIGGNVTDGCGEFMPSGEEGTLEALKCAACNCHRNFRHKEIPNNVGAGVGGVGGDNNNNAGIMVV<br>HPLQLPQPLPSPIPSLNHHHHHHQHGGRSIWTTMPPQPVKMAFGGSGGSGATDSSSEELNFNTYHHQQATSVPPQQPFMLAKKRFRTKFSQEQKEKMLEFAEKLGWRIPREDDAEVQRFCSQVGVRQVFKVWM<br>HNNKNPSSAKKNIIQEDQP                                                                                                                                                                                                                                                                                                                                                                                                                                                                                                                                                                                                                                                                                             |
| SIZF-HD18 | Solyc05g007580 | MELTYSINPTPTPSSTKTPDSEVDTPLIKPLSFTNGNNHSHHNQSPPTAVIYKECLKNHAASIGGHAVDGCGEFMPSPSTPSDPSLKCAACGCHRNFRHREPSDDSSPPAHFIDFRRHIFPPIKRFSPSTPSPLSPSL<br>SPPLPSLFQPQPVTPTGLKSENPNGRKRFRTKFTAQKEKMHFSFEKLGWKLQKCDEAAVDEFCNEIGVGKGVLRVWMHNNKNTFGKDYQISNNSSRDHSFENKNGFNINGTASSNEEDQHRNNNNNDNSTTSNC<br>ELHLHISTNASSSSS                                                                                                                                                                                                                                                                                                                                                                                                                                                                                                                                                                                                                                                                                            |
| SIZF-HD19 | Solyc05g018740 | MSNNSSSNPSGDMTIKYGICLKNHATNFGDYSVDGCREFVKRGDDGTKEAYICANCGCLRSFHRMNSHSLYHPPILRSRFLHPIHPHGRENAPIISHPFMSRFVLVQYIRRPVFYNHP                                                                                                                                                                                                                                                                                                                                                                                                                                                                                                                                                                                                                                                                                                                                                                                                                                                                             |
| SIZF-HD20 | Solyc05g020000 | MTNSSSNPSGDMTIKYGIYLNHATNFGDYSVDGCREFVKKGYGGTKEAYICANCGCLRRFHRMNSHSLYPPILRSHFFHLHVHPHGGENAPIISHPFMSQFVSIQYIRRPVFYNHR                                                                                                                                                                                                                                                                                                                                                                                                                                                                                                                                                                                                                                                                                                                                                                                                                                                                               |
| SIZF-HD21 | Solyc05g051420 | MSKYKECLKNHAAGIGGHAVDGCGEFMPSGDIFKCAVCNCHRNFRKDTVHHHPCGYFPHIMPRRSLVLPSTSRGGGFREDQELLEMCPNPNKIIGTLLKKRFRTKFSQECHKDKMLRLAEKLGWKLQRHDEGVV<br>QQLCNEIGIKRHFVKVWLHNNKHTLGKKTNP                                                                                                                                                                                                                                                                                                                                                                                                                                                                                                                                                                                                                                                                                                                                                                                                                          |
| SIZF-HD22 | Solyc09g089550 | MAAPQRDFNIENQEEPISKIVLYNRYRRVPAVIFRKKYWDWNMSVAVCKLTMVGKFFIPKPKMTKIRASFHAKLSLKGVVKIRSYDSYHVDFDFTAEEDYQSVLLKERVVVAGAIMEVFQWTFEFHDQFREAFGVVEL<br>ENTKKDEHIGGGNEYGTEESDSVACVPEVTHSDSEDRVASPIKCETSKLPSSVGISCSEFSGLSSAPYRITGRIPSVTYESSSMCSTELVPFRGTYLNHNNLKSYSREWNYGSKPTSEAADLACETLSQPLYALSIVERHEN<br>QKSRPIEVQHSTYMGYP TLTFPRRYGESLVSDYKLTLLGNFSYKRPKMKEIRADFKAQNPLSGQVKIRNCSSRQVLILFSNEEDYTYVLYKKAHVAGALMQISWSSPDFHHEVKQNIHPDFRLSDAKSVNWN TDTSK<br>LHPSINGLLAPATDEKSMQLQVPAVSQCLSVSPICPPLLLAHSVSVAGRLCADRLTTSGIYVPQSYPKGIVGIPFGSNEQAGSGNTFPRPSQALNQSLAQQHNQLNSYKPNMTVRIAQLQPPSTTSVSDITSSIRYRECL<br>KNHAASMGGHALDGCGEFMPSGEEGTPGALKCAACNCHQNFRHKEIDDYQPMDDVGSHSRFSQPRNNSSSGSIQNQVLISLPTQQYHHHDYSDSCSPRSLVDSLQPYTQPPSPSTSGSVSQQALERIQPSSIRSSYSYEM<br>VNHNTMQNGKQREYFWSOSSRNTSRDHPSVRNENWNFDMDKPLNNRTPDHIPLEFTYPSRCQPQTFTDEFPHLDIINNLLHEEHETGRTLMSNSGSQRLNKG S*<br>MEFEDNNNNNDEEQEEDMNLHEEEEDDDAVYDSPPLSRVLPKASTESHETTGTSTGGGGGFVVHGGGGSRRFRFRECLKNQAVNIGGHAVDGCGEFMPAGIEGTIDALKCAACGCHRNFRKELPYFHHAPPQHQ |
| AtZF-HD1  | AT5G65410.1    | PPPPPGFYRLPAPVSYRPPPSQAPPLQLALPPQRESEDPMETSSAEAGGGIRKRRHTKFTAQEKERMLALAERIGWRIQRQDDEVIQRFCQETGVPRQVLKVWLHNNKHTLGKSPSPLHHHQAPPPPPQSSFHHEQ<br>DQP                                                                                                                                                                                                                                                                                                                                                                                                                                                                                                                                                                                                                                                                                                                                                                                                                                                    |

|           |             |                                                                                                                                                                                                                                                                                                                                                                                   |
|-----------|-------------|-----------------------------------------------------------------------------------------------------------------------------------------------------------------------------------------------------------------------------------------------------------------------------------------------------------------------------------------------------------------------------------|
| AtZF-HD2  | AT4G24660.1 | MNFEDQEEDMEMSGVNPPCGYDSLSGEGATSSGGGGVGRSKGVGAKIRYRECLKNHAVNIGGHAVDGCCEFMPSGEDGTLDALKCAACGCHRNFRHKETESIGGRAHRVPTYYNRPPQPHQPPGYLHLTSPAAPY<br>RPPAASGDEEDTSNPSSSGGTTKRFRTKFTAEEQKEKMLAFAERLGWRIQKHDDVAVEQFCAETGVRRQVLKIWMHNNKNSLGKKP<br><br>MEIASQEDPIPINTSYGNSGGGHGNMNHSHHANSAPSSLNITTSNPLLVSNSNGLGKNHDHSHHHHVGYNIMVTNIKKEKPVVIKYKECLKNHAATMGGNAIDGCGEFMPSGEEGSIEALTCVCNCHRNFRHRETE |
| AtZF-HD3  | AT2G02540.1 | GEEKTFFSPYLNHHQPPQQRKLMFHHKMIKSPLQQMIMPIGVTTAGSNESEDLMEEEGGGSLTFRQPPPPSPYSYGHNQKKRFRTKFTQEQKEKMISFAERVGWKIQRQEESSVVQQLCQEIGIRRRVLKVVMMHN<br>NKQNLSKKSNVSNVLDLSAGNNDITENLASTNP<br><br>MEIASQEDHDMPIPLNTTFFGGGGSHGMIHHHDHHAANSAPPTHNNNNTTQPPMPLHGNGHGNNYDHHHQDPHHVGYNAIHKPMIKYKECLKNHAAAMGGNATDGCGEFMPSGEDGSIEALTCACNCHRNFR                                                         |
| AtZF-HD4  | AT1G14440.1 | HRKEVEGELAATAMSPYHQPPHRKMLNLHQKIRSAMPHQMIMPIGVSNRYMHNNSESEDFMEEDGVTASRSLPNLPYNQKKRFRTKFTPEQKEKMLSFAEKVGWKIQRQEDCVVQRFCIEIGVKRRVLKVWM<br>HNNKIHFSSKNNINLEDNDNEKINNLNVDLSGNNDMTKIVP<br><br>MDMRSEMIERRREDNGNNNGVVISNIISTNDDNCNGNNNTRVSCNSQTLDDHQQSKSPSSFSISAAAKPTVRYRECLKNHAASVGGSVHDGCGEFMPSGEEGTIEALRCAACDCHRNFRHKEMDGVGSSDLISHH                                                  |
| AtZF-HD5  | AT1G75240.1 | RHHHYHHNQYGGGGRRPPPPNMMLNPLMLPPPNYQPIHHHKYGMSPGGGGMVTPMSVAYGGGGGAESSSEDLNLYGQSSGEGAGAAAGQMAFSMSSSKRFRTKFTTDQKERMMDFAEKLWWRMNKQD<br>EEELKRFCGEIGVKRQVFKVWMHNNKNNAKKPPTPTTL<br><br>MEVREKKDEKMEMTRRKSSALDHHRLPPYTYSQATANKEKPTTKRNGSDPDPDPLDTNPISISHAPRSYARPQTTS PGKARYRECQKNHAASSGGHVVDGCGEFMSSGEEGTVESLLCAACDCHRSFHRKEIDGLFV                                                       |
| AtZF-HD6  | AT2G18350.1 | VNFNSFGHSQRPLGSRHVSPIIMMSFGGGGGCAAESSTEDLNKFHQSFSGYGVDQFHHYQPKKFRRTKFNEEQKEKMEFAEKIGWRMTKLEDEVNRF CREIKVKRQVFKVWMHNNKQAAKKDL<br><br>MELGGKCNAITTTT MISTEVKPHTDPEPEAKPESDPSMALFPIKENQKPKTRVDQGA KYRECQKNHAASTGGHVVDGCCEFMAGGEEGLGALKCAACNCHRSFHRKEVYGHNRNSQDQHQLMITPAFYSSNSSYK                                                                                                     |
| AtZF-HD7  | AT3G50890.1 | PRVMHPTGEIGRRTSSSED MKKILSHRNQNV DGKSLMMMMMRKKRVRTKINEEQKEKMEFAERL GWRMQKKDEEIDKFCRMVNLRRQVFKVWMHNNKQAMKRNNSE<br><br>MDVIATTTTIVSDLDSRQPEIEAPIRIQPAKPISFNGKRCHHHHLASEAVAVATYKECLKNHAAGIGGHALDGCGEFMPSPSFNSNDPASLTCAACGCHRNFRHREEDPSSL SAIVPAIEFRPHNRHQLPPPPPHLAGIR                                                                                                                |
| AtZF-HD8  | AT5G15210.1 | SPDDDDASPPPISSSYMLLALSGGRGGANTAVPMSRKRFRTKFSQYQKEKMFESERV GWRMPKADDVVVKEFCREIGVDKSVFKVWMHNNKISGRSGARRANGGVVVGVDGRSQSVPTNGSFSST<br><br>MLEVRSMDMTPKSPEPESETPTRIQPAKPISFNGIIRHHHHHHNNNKVTYKECLKNHAAAGGHALDGCGEFMPSPSSTPSDPTSLKCAACGCHRNFRHRETDSSAVPPPSLLPSSTTTAAIEYQPHHRHHPPPPPLAP                                                                                                  |
| AtZF-HD9  | AT3G28920.1 | PLPRSPNSSPPPISSSYMLLALSGNNKTAPFSDLNFAAAANHLSATPGSRKRFRTKFSSNQKEKMHEFADRIGWKIQKRD EDEVDRFCREIGVDKGVLK VWMHNNKNSFKFSGGGATTVQRNDNGIGGENSDDGV<br>RGLANDGDGGGGRFESDSGGADGGGNVNASSSS<br><br>MMDMTPTTTTTTTTTPTPKSPEPESETPTRIQPAKPISFNGIIRHHHHHHPLIFTYKECLKNHAAALGGHALDGCGEFMPSPSISSDPTSLKCAACGCHRNFRHRDPDNNNDSSQIPPPSTAVEYQPHHRHHPPPPPPPP                                                |
| AtZF-HD10 | AT5G39760.1 | PRSPNSASPPPISSSYMLLSL SGTNNNNNLASFSDLNFSAGNNHHHHHQHTLHGSRKRFRTKFSQFQKEKMHEFAERVGWKMQRDEDDVRDFCRQIGVDKSVLK VWMHNNKNTFNRRDIAGNEIRQIDNGGGNH<br>TPILAGEINNHNNGHHGVGGGGELHQS VSSGGGGGGFSDSGGANGGNVNGSSSS<br><br>MDLSSKPQQQLNSLPIAGELTVTGEMGV CYKECLKNHAANLGGHALDGCGEFMPSPTATSTDPSSLRCAACGCHRNFRHRDPSENLNFLTAPPISPSGTESPPSRHVSSVPVCSYYSAPPHVILSLSSGFPGPSDQD                             |
| AtZF-HD11 | AT1G69600.1 | PTVVRSENSSRGAMRKRTRTKFTPEQIKMRAFAEKAGWKINGCDEKSVREFCNEVGIERGVLK VWMHNNKYSLN GKIREIEHGLCLNTHSNDGDGSSSS<br><br>MVLVLYNECLKNHAVSLGGHALDGCGEFTPKSTTILTDPPSLRCDACGCHRNFRHRSPSDGFSQHRSPPSPLQLQLAPVPNLLLSLSSGFGPSDQEVKNKFTVERDVRKTAMIKKHKRTKFTA EQVKVMRGFAERAG                                                                                                                           |
| AtZF-HD12 | AT5G60480.1 |                                                                                                                                                                                                                                                                                                                                                                                   |

|           |                  |                                                                                                                                                                                                                                                                                                                                                                                                                                            |
|-----------|------------------|--------------------------------------------------------------------------------------------------------------------------------------------------------------------------------------------------------------------------------------------------------------------------------------------------------------------------------------------------------------------------------------------------------------------------------------------|
|           |                  | WKINGWDEKWVREFCSEVGIERKVLKVWIHNNKYFNNGRSRDTTSSMSLNLKL                                                                                                                                                                                                                                                                                                                                                                                      |
| AtZF-HD13 | AT5G42780.1      | MDEIKPKKEENSKRRNRVKPICRETGDHVVHYLPTCKTKPKPTRTHHAPPILDSIFKVTHKPHYECRKNHAADIGTTAYDGCGEFVSSTGEEDSLNCAACGCHRNHFHREELIPENGGVTETVLEVLKISSCQFRIFCSP<br>YGGGKSEGKKKKKEKESYGGDPIIKDRFGGAEEEEGIVKRLKTKFTAETKEMRDYAEKLRWKVRPERQEEVEEFCVEIGVNRKNFRIWMNNHKDKIIIDE                                                                                                                                                                                       |
| AtZF-HD14 | AT1G14687.1      | MQSTCVYRECMRNHAAKLSY AIDGCREYSQPSTGDL CVACGCHRSYHRRIDVISSPQINHTRFPTSLRRVKQLARLKWKTAEERNEEEEDDTEETSTEEKMTVQRRRKSKFTAEOREAMKDYAAKLGWTLKDKR<br>ALREEIRVFCEGIGVTRYHFKTWVNNNKKFYH                                                                                                                                                                                                                                                               |
| AtZF-HD15 | AT1G74660.1      | MMKKRQMVIKQRSRNSNTSSSWTTSSSSSSSEISNVRYVEQCQNHAANIGGYAVDGCREFMAAGVEGTVDALRCAACGCHRNHFHRKEVDTEVVCEYSPPNA                                                                                                                                                                                                                                                                                                                                     |
| AtZF-HD16 | AT3G28917.1      | MRKRQVVLRRASPEEPSRSSSTASSLTVRTVRYGECQKNHAAAVGGYAVDGCREFMASRGEETVAALTCAACGCHRSFHRREIETEVCDCNSPPSTGN                                                                                                                                                                                                                                                                                                                                         |
| AtZF-HD17 | AT1G18835.1      | MKKRQVVIKQRKSSYTMSSSSNVRYVEQCQNHAANIGGYAVDGCREFMASGGDDALTCACGCHRNHFHRREVDTEVVCEYSPPNANN                                                                                                                                                                                                                                                                                                                                                    |
| OsZHD1    | LOC_Os09g29130.1 | MDFDHDDGDDEEMPPMPVSSSYETPPQHGLAGGGMAPKPPGEIGSRVKGPSGGGRYRECLKNHAVGIGGHAVDGCGEFMAAGEEGTIDALRCAACNCHRNHFHRKESESLAGEGSPFSPA AVVPY GATPHHQFSPY<br>YRTPAGYLHHHQHHMAAAAAAAAAAAGGYPQRPLALPSTSHSGRDDGDDL SGMVGPMSAVGPLSGMSLGAGPSGSGSGKKRFRTKFTQE QDKMLAFAERVGWRIQKHDEAAVQQFCDEVGVKRHV LKVWMH<br>NNKHTLGKKLP                                                                                                                                        |
| OsZHD2    | LOC_Os08g37400.1 | MDFDHDEGDDEEMPPMPLSSGYDAPMQPLGGGGGGVPKPGGGVGGGGGGGGGGGGGARYRECLKNHAVGIGGHAVDGCGEFMASGEEGSIDALRCAACGCHRNHFHRKESESPTGVGAEPSAVSPAISA<br>YGASPHHQFSPYYRTPAGYLHHQQHQMAAAAAAAAAAGGYPQRPLALPSTSHSGRDEDDMSGMVGPMVIGPMVGMSLGSAGPSGSGSGKKRFRTKFTQE QDKMLAFAERL GWRIQKHDEAAVQQFCEEV<br>CVKRHV LKVWMHNNKHTLGKKAP                                                                                                                                       |
| OsZHD3    | LOC_Os12g10630.1 | MDLSGAQGELPLPMHAAASPYLGLHHDHHHHHGGGGGGGMNGRHMSPTPPAAAEESKAVVVVSSSATAAARYRECLKNHAAIGGSATDGCGEFMPGGEESLDALRCSACGCHRNHFHRKELDAAAAPLHH<br>HHHQLLGVGAHPRGHGHHHHHLLVAALPPPTRMV MPLSAMHTSESDDAAARPGGGAAARKRFRTKFTA EQKARMLGFAEEVGWRLQKLEDAVVQRFCQEVGVKRRVLKYGSGAPEELKKLDFFWERRGGGGG<br>NPLRNKMKIHLASASTSIRLQLSPTETL                                                                                                                               |
| OsZHD4    | LOC_Os11g13930.1 | MVSILQLQTRTEASPASASAAATRIFAVRRQQQE QEGEEEEFEFQERMDLSGAQGELPIPMHASAAASPFAGMGAHGGAGGGHVVELHRHEHVGNNGQAMAMASPPPTNVAVAAEQEGSPVAGKKRGGMAV<br>VGGGGGVAVKYRECLKNHAAAGGNATDGCGEFMPSGEEGSLEALKCSACGCHRNHFHRKEADDLADSCAAALRAAAGRHHHLLGPALPHHHHKNGGGLLVAGGDPYGAAAYAAARALPPPPPPPHGHHHHHQI<br>IMPLNMIHTSEDEMDVSGGGGGVGRGGGSSSSKKRFRTKFTA EQKARMLFAERVGWRLQKLD DAMVHHFCQEIGV KRRVLKVWMHNNKHN LAKKPLPSSPPPPQIPPM SMPPSPPPQIPPM SMPPSPPPMPM<br>PMPPSPQLKLE |
| OsZHD5    | LOC_Os01g44430.1 | MELSEHEEDAGDVGGCSPPTPPHRVLTSAAPETIRCRYHECLRNHAAASGGHVVDGCGEFMPASTEELACAACGCHRSFHRRDPSPRAGAARLPQLHLPASINSRAPALLLPAAAAASKQGLFPGYGTPSGGT<br>GTTTASSSDERLRSPVQPRRRSRTTFTREQKEQMLAFAERVGWRIQRQEEATVEHFCAQVGVRRLQALKVWMHNNKHSFKQKQQQENRQEQQQ                                                                                                                                                                                                     |
| OsZHD6    | LOC_Os05g50310.1 | MEFRGHDEPVDEMGVAYGRTPSSSSSPAASASAGNGAGAAEVRYHECLRNHAAAMGGHVVDGCREFMMPGDAADALKCAACGCHRSFHRKDDGQQQQLRL LIPSPPTPRVPLLMPPQPQPHPHPQHPYLHP<br>PPFYHHTPSGSGGTTTESSEERGPPSSAAAAQGRKRFRTKFTPEQKEQMLAFAERVGWRMQKQDEALVEQFCAQVGVRRLQVFKVWMHNNKSSIGSSSGGSRQPQEQQSQQQQQQ                                                                                                                                                                                |

|          |                  |                                                                                                                                                                                                                                                                                                                                                                                                                   |
|----------|------------------|-------------------------------------------------------------------------------------------------------------------------------------------------------------------------------------------------------------------------------------------------------------------------------------------------------------------------------------------------------------------------------------------------------------------|
| OsZHD7   | LOC_Os02g47770.1 | MEYKRSSHVEEEEEEEEDDEEEDDEEQGHHQYTTAAAQQLHPQVLGSSASSPSSLMDSAAFSRPLLPPNLSLVSPSAAAAAAPGGSYLHAAHHHGQGRRVEAPGGESQHHLQRHHEPARNGVLGGVAGAHAAAS<br>TLALVGGGGGGPRGGEGAAGEAPTWRYPRECLKNHAARMGAHVLGDCGEFMSSPGDGAAALACAACGCHRSFHRREPAVVAPASLSLCPASASASAAAGLVSLSPSATPTGANSSRLMPLLLAPPHMQKRPPVLPV<br>SPASAPAALAESSEELRPPLPSSHPHAHAAAVVAASASAPPGSKKRFRTKFTAQKERMREFAHRVGVRIHKPDAAAVDAFCAQVGVSRRLVKGDDTSTALAAKPPFLRAFAAFFGGQFCLSCF |
| OsZHD8   | LOC_Os04g35500.1 | MMDHLSLVPYEGGSAGGGGGGGKYKECMRNHAAAMGGQAFDGCGEYMPASPSLKAACGCHRSFHRRAAGIGGGPVFFRPPPPQPHSHHAALQGFLPSSVPAPAPPPQLALPYHAVPAAAWHHAAAAAAGR<br>AGSETPPRMDDFGPGSAGSGSGGGGIGFRKRFRTKFTPEQKERMREFAEKQGWRINRNDGALDRFCVEIGVKRHVLKVMHNHKNQLASSPTSAAAAAGVMNPGAGIGLGTGLGTGISGDGDGDDDDTDDSP<br>PRAAVSSPSPISV                                                                                                                        |
| OsZHD9   | LOC_Os09g24820.1 | MEAMDVKYKPLVFPNGAIKKAAPAAVAPAVGGGGGGETVYRECLKNHAASLGGHALDGCGEFMPSAANPADPTSLRCAACGCHRNFRRLPEGSPPPPPALLPAPMPPHRGEETPEVRLPGVDGEDSDSDS<br>DGSEYDDERSVSPPPPLAAAVAHQVYYPSAPHMLLSLGSSGQAQRLPPQVMSAAAAAPPGGGGGMPRKRFRTKFTAQKQRMQELSERLQWRLQKRDEAIVDEWCRDIGVGKGVFKVVMHNNKHNYLGHH<br>SARRSASSSSAAAAAPPFNPTSPPPPPPPHATDFNINGTATAATAAAAATIAAGNHQENGASSPQSA                                                                    |
| OsZHD10  | LOC_Os08g34010.1 | MEAVVGKYRPVFPNGGAAAAAGKSKATPASATAAVYRECLKNHAASLGGHAVDGCGEFMPSAADAADPASLKAACGCHRNFRRLPEAPSPPLLALPPPPPPPPPPPPQPPQHLPRTAAVAVAPQLLLH<br>GSHQRREQSPETDRVRGPGHHHDDDAADDDSEDSEMSDYDDDRSASPLQAPPPVLSPGYLSATHMLLSLGSASAPAVAASRPHAAAAAMGPPPPGAATSASRKFRFTKFSPEQKQRMQALSERLQWRLQKRD<br>EAVVDECCREIGVGKGVFKGQLVLPLSTVITSFVLELIWVCMDNDDDDVLIGVLGGVVF                                                                           |
| OsZHD11  | LOC_Os03g50920.1 | MEQQQERPREVYRECMRNHAAKLGTYANDGCCEYTPDDGHPAGLLCAACGCHRNFRHKDFLDGRATAAAGGAGGAGVGVAPMLPAPGGGGPPGYMHMAAMGGAVGGGGVDGGGGSGGRRRTRTKFTEEQ<br>KARMLRFAERLQWRMPKREPGRAPGDDEVARFCREIGVNRQVFKVWMHNNHAGGGGGGGSGGPGAGGGAQTSSSTTRGGGDVGVLSPAMGGDGEDDEEVRGSEMCM                                                                                                                                                                   |
| OsZHD12  | LOC_Os11g03420.1 | MGPQQDRSAAKPYANGSTAAAAAAGRKENNKVVRYRECQRNHAASIGGHAVDGCREFMASGAEGTAAALLCAACGCHRSFHRREVEAAAAECDCSSDTSSGTGRR                                                                                                                                                                                                                                                                                                         |
| OsZHD13  | LOC_Os12g03110.1 | MGPQQDRSAAKPYANGSTAAAAAAGRKENNKVVRYRECQRNHAASIGGHAVDGCREFMASGADGTAAALLCAACGCHQSFRHREVEAAAAECDCSSDTSSGTGRR                                                                                                                                                                                                                                                                                                         |
| OsZHD14  | LOC_Os09g24810.1 | MMKRLVVLRRREPAVRFSCCGVRYGECRRNHAASGGHAVDGCREFIAEDGGGNSTSAVGVAALKAACGCHRSFHRRVQVYEVAWDDDCASGDTSSSSPSSSSLSSE                                                                                                                                                                                                                                                                                                        |
| OsZHD15  | LOC_Os06g23030.1 | MMKRMVILRRCEPPPPQAAAVVAAMGGCCGRVRYGECRRNHAARMGGHAVDGCREFLAEGEETGGALRCAACGCHRSFHRRVVVVQCCACDTAAAAAAGGWEWRDCSPSSSSASSTTAS                                                                                                                                                                                                                                                                                           |
| NsZF-HD1 | mRNA_48369_cds   | MEFETQEDQKEIRASPNNYSVLEISNSTNEPKMPSNSDELILDAPLQMRKPKYKECLKNHAVGIGGHAVDGCGEFMPAGEDGSLDALKAACNCHRNFRHFKETQIHHPYPYRTPPCGYFQHVMPQRPLALPSTSGGG<br>GYREDQEEMCNPNNSGTTKFRFRTRFNQEQKEKMLEAENLGWRIQRQDEGVVQQLCNEIGIKRHVFKVWMHNNKLTGKKTLIQSISPSLFPAQERS                                                                                                                                                                     |
| NsZF-HD2 | mRNA_48370_cds   | MEFETQEDQKEIRASPNNYSVLEISNSTNEPKMPSNSDELILDAPLQMRKPKYKECLKNHAVGIGGHAVDGCGEFMPAGEDGSLDALKAACNCHRNFRHFKETQIHHPYPYRTPPCGYFQHVMPQRPLALPSTSGGG<br>GGGGYREDQEEMCNPNNSGTTKFRFRTRFNQEQKEKMLEAENLGWRIQRQDEGVVQQLCNEIGIKRHVFKVWMHNNKLTGKKTLIQSISPSLFPAQERS                                                                                                                                                                  |



|           |                |                                                                                                                                                   |
|-----------|----------------|---------------------------------------------------------------------------------------------------------------------------------------------------|
|           |                | MEFDEEHEEQEEEIGNIHQISSAAANVNFQTQGNNSVRGVEEGVSTTVRKSSVRYRECLKNHAVGIGGHAVDGCRDFMPAGEEGTMDALKCAACNCHRNHRKEVEGEVFHHTPPPHLTHHHQPPHSQHPQ                |
| NsZF-HD3  | mRNA_54725_cds | MEVPNEEGEMAMPINSAYGHGHMIIHDPAPQNNHIISSQIITSKNGPPISSNKKMMKYKECLENHAAAMGGNATDGCGEFMPSGEEGINQEDGIINGGCGVMARPLNYQQLVKKRFRTKFSQEKEKMLNFAEKIG           |
| NsZF-HD4  | mRNA_60670_cds | WKMQKQEEAMVQQFCQQVGVKRRLLKVWMHNLAKKNSNDINTESQV                                                                                                    |
|           |                | MEIPSQEEEMPMPINSTYVGGGGGHGHGHIIHHDPTVPNNTNHIISSVANSINGPPIEATPVSAHHVYPYKKIVRYKECLKNHAAAMGGNATDGCGEFMPSGEEGTIEALICSACNCHRNHRKEIEGEQQLQLQPP          |
|           | mRNA_61886_cds | PSSCDYYNLNRGGKKVYLGSHNHHKSLLGPEQYGTIIPSRATAPHHHQMIMSYNNMGSPLSEEEHEDINGGGGVMAMAMARPLHHHNQMVKKRFRTKFTQEKEKMFNFAEKVGWIKQKEETVVQQFCQEL                |
| NsZF-HD5  |                | GIKRRVLKVWMHNNKHNLAKKNSNV TIPQNV                                                                                                                  |
|           |                | MALAGEDKEMRMQGS LGYHSLDQGNQH HHQPNNNNLQPQDNEKSSSGGTGAAPPVVVPYSSGGSTNNKFITSRARYRECLKNHAAASIGGNVTDGCGEFMPSGEEGTLEALKCAACNCHRNHRKEQPNVDNN            |
|           | mRNA_63507_cds | NAGIMVVHPLQLPQLPSPLPSMNH HHQHGRSVWSTMPPQPVKMAFGSGGGGSGATDSSSEELNFNTYQQATSVPPQPQPPFMLAKKRFRTKFTQDQKEKMLEFAEKLGW RIPREDDTEVQRFC SQVGKRVFK           |
| NsZF-HD6  |                | VWMHNNKNPSAKKNPQEEP                                                                                                                               |
|           |                | MDFENHQEEEETEPPRHDDSLDNSNSTHTKMPSPTEMELEPLAVVHTWHNNPKPYKECLKNHAVSIGGHAVDGCGEFMPAGEDGSLDSLKCAACNCHRNHRKITQPPNAVEPLPFVNYHSSYYRSLPPPCGYL             |
| NsZF-HD7  | mRNA_72248_cds | QYHVAPQQRPLALPSTSGGGGYWEDQEDMSNLNNSGGSGSKRFRTKFSQEKEKMQELADKLGWRIQREDEELVQQLCNETGVRRQVFKVWMHNNKNTLGKKP                                            |
|           |                | RQAVTFPENYWESLVPDCKLTLIGNFFQRKPRMKEIRADFI AKNPLKGQVKITHYTSQQVSLDFTNEADYDTVLSKKTLTVAVMQISWWSRDIHHEVGKQEWKAMDKERDVKPGIMEQQKTDELIGGETEYKIDA          |
|           | M              | PEAVLETPDILGEVSDVSNSLHIVPEVAHPDFRDNDASPVNCDTDTSKMHP SIGITCCQLSGISAPQN MIDGTSPYVMNVNSSK CSTYSILSIVTTGLSSNDKDQSKSIRDVADSASKAHSQPLDDLPEARQ QMLKKDVA  |
|           |                | VSHQSELTESDRERHSSEIPSVSPPRSPPRSIGSVIQLMSKLKVSVTNDPNSVKRSTSDNSNLTQKSVPLFNSAENAVLLSVDPHKSI EPKAI EKPLVRSISITTENFPSNQVTASATAEMPMPLLPTLPLLAHSVSPAAQLC |
|           |                | ADPPTAIDTYVPQSYPNGIVGSHIFGRSEQAGSGSIFSPSQALHQHSLAQRHSQLNSYKVDKNAHL DQESNM IAGPTQLQSLTTSVSDTTSSIRYMECLKNHAASMGGH AIDGCGEFMPSGGEGTPGALKCEACNCH      |
|           |                | RNFHRKKIINHRQMAGIGSHIEPRNNSNSRNIHKQSPISQYQHNYSYSPSSVVNSSDSYPQLPLPISGQICLPQGLEKKEPSLIRPSYSYEMVNHD TVQQWEYFWRDRSRNTSIDHPSLRNENQN FDMFKPLNYRTSDNI    |
| NsZF-HD8  | RNA_82504_cds  | PSEFANEFPHLDIINNRLRYDEHGKGRTLMPNSGFQNL SNGSYHLNGHFT                                                                                               |
|           |                | TFPENYWESLVPDCKLTLIGNFFQRKPRMKEIRADFI AKNPLKGQVKITHYTSQQVSLDFTNEADYDTVLSKKTLTVAVMQISWWSRDIHHEVGKQEWKAMDKERDVKPGIMEQQKTDELIGGETEYKIDAPEAV          |
|           |                | LETPDILGEVSDVSNSLHIVPEVAHPDFRDNDASPVNCDTDTSKMHP SIGITCCQLSGISAPQN MIDGTSPYVMNVNSSK CSTYSILSIVTTGLSSNDKDQSKSIRDVADSASKAHSQPLDDLPEARQ QMLKKDVAVSHQ  |
|           |                | SELTESDRERHSSEIPSVSPPRSPPRSIGSVIQLMSKLKVSVTNDPNSVKRSTSDNSNLTQKSVPLFNSAENAVLLSVDPHKSI EPKAI EKPLVRSISITTENFPSNQVTASATAEMPMPLLPTLPLLAHSVSPAAQLCADPP |
|           |                | TAIDTYVPQSYPNGIVGSHIFGRSEQAGSGSIFSPSQALHQHSLAQRHSQLNSYKVDKNAHL DQESNM IAGPTQLQSLTTSVSDTTSSIRYMECLKNHAASMGGH AIDGCGEFMPSGGEGTPGALKCEACNCHRNH       |
|           |                | RKKIINHRQMAGIGSHIEPRNNSNSRNIHKQSPISQYQHNYSYSPSSVVNSSDSYPQLPLPISGQICLPQGLEKKEPSLIRPSYSYEMVNHD TVQQWEYFWRDRSRNTSIDHPSLRNENQN FDMFKPLNYRTSDNIPSEFA   |
| NsZF-HD9  | mRNA_82505_cds | NEFPHLDIINNRLRYDEHGKGRTLMPNSGFQNL SNGSYHLNGHFT                                                                                                    |
|           |                | PPIQVQYSTYRGRQAVTFPENYWESLVPDCKLTLIGNFFQRKPRMKEIRADFI AKNPLKGQVKITHYTSQQVSLDFTNEADYDTVLSKKTLTVAVMQISWWSRDIHHEVGKQEWKAMDKERDVKPGIMEQQKTDEL         |
| NsZF-HD10 | mRNA_82506_cds | ELIGGETEYKIDAPEAVLETPDILGEVSDVSNSLHIVPEVAHPDFRDNDASPVNCDTDTSKMHP SIGITCCQLSGISAPQN MIDGTSPYVMNVNSSK CSTYSILSIVTTGLSSNDKDQSKSIRDVADSASKAHSQPLDDLPE |

|           |                |                                                                                                                                                                                                                                                                                                                                                                                                                                                                                                                                                                                                                                                                                                                                                                                                                                                                                                                                                                                                                                                                                                                                                                                                                                                                                                         |
|-----------|----------------|---------------------------------------------------------------------------------------------------------------------------------------------------------------------------------------------------------------------------------------------------------------------------------------------------------------------------------------------------------------------------------------------------------------------------------------------------------------------------------------------------------------------------------------------------------------------------------------------------------------------------------------------------------------------------------------------------------------------------------------------------------------------------------------------------------------------------------------------------------------------------------------------------------------------------------------------------------------------------------------------------------------------------------------------------------------------------------------------------------------------------------------------------------------------------------------------------------------------------------------------------------------------------------------------------------|
|           |                | ARQQMLKKDVAVSHQSELTESDRERHSSEIPSVSSPPRSPRSIGSVIQLMSKLKVSVTNDPNSVKRSTSDNSNLTQKSVPLFNSAENAVLLSVDPHKSIEPKAIEKPLVRSISITTENFPSNQVTASATAEMPMPLLPTLPL<br>LAHSVSPAQLCADPPTAIDTYVPQSYPNGIVGSHIFGRSEQAGSGSIFSPSQALHQHSLAQRHSQLNSYKVDKNAHLQDQSNMAGPTQLQSLLTTSVSDTTSSIRYMECLKNHAASMGGAIDGCGEFMPSGGEGT<br>PGALKCEACNCHRNFRKKIINHRQMAGIGSHIEPRNNSNSRNIHKQSPISQQYQHNSYSPSSVNVSSDSYPQLPLPISGQICLPQGLEKKEPSLIRPSYSYEMVNHDTVQQWEYFWRDRSRNTSIDHPSLRNENQNFD<br>MFKPLNYRTSDNIPSEFANEFPHLDIINNRLRYDEHGKGRITLMPNSGFGNLSNGSYHLNGHFT<br>VTFPENYWESLVPDCKLTLIGNFFQRKPRMKEIRADFIKKNPLKGVKITHYTSQQVSLDFTNEADYDTVLSKKTLTVAVMQISWWSRDIIHHEVGKQEWKAMDKERDVKPGIMEQQKTELDELIGGETEYKIDAPEA<br>VLETPDILGEVSDVSNLHIVPEVAHPDFRDNDASPVNCDTDTSKMHPSIGITCCQLSGISAPQNMIDGTSPIYVMNVNSSKSTYSILSIVTTGLSSNDKQSKSIRDVADSASKAHSQPLDDLPEARQQMLKKDVAVSH<br>QSELTESDRERHSSEIPSVSSPPRSPRSIGSVIQLMSKLKVSVTNDPNSVKRSTSDNSNLTQKSVPLFNSAENAVLLSVDPHKSIEPKAIEKPLVRSISITTENFPSNQVTASATAEMPMPLLPTLPLLAHSVSPAQLCADP<br>PTAIDTYVPQSYPNGIVGSHIFGRSEQAGSGSIFSPSQALHQHSLAQRHSQLNSYKVDKNAHLQDQSNMAGPTQLQSLLTTSVSDTTSSIRYMECLKNHAASMGGAIDGCGEFMPSGGEGTGPALKCEACNCHRN<br>FRKKIINHRQMAGIGSHIEPRNNSNSRNIHKQSPISQQYQHNSYSPSSVNVSSDSYPQLPLPISGQICLPQGLEKKEPSLIRPSYSYEMVNHDTVQQWEYFWRDRSRNTSIDHPSLRNENQNFD<br>MFKPLNYRTSDNIPSEFANEFPHLDIINNRLRYDEHGKGRITLMPNSGFGNLSNGSYHLNGHFT |
|           | mRNA_82508_cds | MQGDKANDNIYRECLRNHAASLSGYATDGCGEFTLDDNNNNNTSPRSASLHCAACGCHRNFRKVMYGASYSNNSSRDREIVAELTDYGGGRMSAALTAESPRSGKKRFRTKFTTDQKEKMLAFAEKLGWTL                                                                                                                                                                                                                                                                                                                                                                                                                                                                                                                                                                                                                                                                                                                                                                                                                                                                                                                                                                                                                                                                                                                                                                     |
| NsZF-HD11 |                | QRKDQENETERFCREHLRHLFLVPFFIFF                                                                                                                                                                                                                                                                                                                                                                                                                                                                                                                                                                                                                                                                                                                                                                                                                                                                                                                                                                                                                                                                                                                                                                                                                                                                           |
| NsZF-HD12 | mRNA_82807_cds | MQGDKANDNIYRECLRNHAASLSGYATDGCGEFTLDDNNNNNTSPRSASLHCAACGCHRNFRKVMYGASYSNNSSRDREIVAELTDYGGGRMSAALTAESPRSGKKRFRTKFTTDQKEKMLAFAEKLGWTL                                                                                                                                                                                                                                                                                                                                                                                                                                                                                                                                                                                                                                                                                                                                                                                                                                                                                                                                                                                                                                                                                                                                                                     |
| NsZF-HD13 | mRNA_82808_cds | QRKDQENETERFCREVGVSRKVFVWMHNNHKNNTSSVSTGNASSLTQ                                                                                                                                                                                                                                                                                                                                                                                                                                                                                                                                                                                                                                                                                                                                                                                                                                                                                                                                                                                                                                                                                                                                                                                                                                                         |
|           | mRNA_9947_cds  | MDISSNTNTAIAATTVKSTEAEPETPIRIQPAKPIFSNGVLKRHNSLHLPHHHGFNNNHAAAHVVTYKECLKNHAASLGGAHDGCGEFMPSPPTANPVDPTSLKCAACGCHRNFRHREPEEPVLPNQNTIPALEYQPH<br>HRHHPPPPPPHHGGSGGHSSPNSSPPPISSAYYPASAPHMLLALSAGLSGPPAETNPLISPSSNPMSSAHLNPNNGSGRKRFRTKFTQDQKERMLEFAEKVEWKIQKRDEELISDFCSKIGVEKGVLVWMHNNKCKK                                                                                                                                                                                                                                                                                                                                                                                                                                                                                                                                                                                                                                                                                                                                                                                                                                                                                                                                                                                                                 |
| NsZF-HD14 |                | DQATAAAAVNAVASTNNLNGNANGFGFISRNNTDAIASEFHHRESSNDNDKNHNNHLLHNNDVSVAHGVTNNGSSSSS                                                                                                                                                                                                                                                                                                                                                                                                                                                                                                                                                                                                                                                                                                                                                                                                                                                                                                                                                                                                                                                                                                                                                                                                                          |
|           | mRNA_9948_cds  | MDISSNTNTAIAATTVKSTEAEPETPIRIQPAKPIFSNGVLKRHNSLHLPHHHGFNNNHAAAHVVTYKECLKNHAASLGGAHDGCGEFMPSPPTANPVDPTSLKCAACGCHRNFRHREPEEPVLPNQNTIPALEYQPH<br>HRHHPPPPPPHHGGSGGHSSPNSSPPPISSAYYPASAPHMLLALSAGLSGPPAETNPLISPSSNPMSSAHLNPNNGSGRKRFRTKFTQDQKERMLEFAEKVEWKIQKRDEELISDFCSKIGVEKGVLVWMHNNKCKK                                                                                                                                                                                                                                                                                                                                                                                                                                                                                                                                                                                                                                                                                                                                                                                                                                                                                                                                                                                                                 |
| NsZF-HD15 |                | DQATAAAAVNAVASTNNLNAMEN                                                                                                                                                                                                                                                                                                                                                                                                                                                                                                                                                                                                                                                                                                                                                                                                                                                                                                                                                                                                                                                                                                                                                                                                                                                                                 |
|           |                | MEFDEEHQEEIEGNIHQISSAAATVNYQTQGNNSVRGVEEGVSTTVRKSSVRYRECLKNHAVGIGGAHDGCGDFMPAGEEGTMDALKCAACNCHRNFRHREVEGEVHFHTPPPHLTHHHPQPHSHHPQFSPY                                                                                                                                                                                                                                                                                                                                                                                                                                                                                                                                                                                                                                                                                                                                                                                                                                                                                                                                                                                                                                                                                                                                                                    |
| NoZF-HD1  | Ntom0273300.1  | TSYRTPHHPSGYLHVTPPSHQRLALPSTSTREDEDMSPSSGGGGNGGVGGSSRKRFRTKFTADQDKMLAFAERLGWRMQKQDEALVQQFAETNVQRHVFKVWMHNNKHTLGKKP                                                                                                                                                                                                                                                                                                                                                                                                                                                                                                                                                                                                                                                                                                                                                                                                                                                                                                                                                                                                                                                                                                                                                                                      |
|           |                | MEFETQEDQKEIKASPNNYSVLEISNSTNEPKMPSNSDELILDAPLQMRPKPYKECLKNHAVGIGGAHDGCGEFMPAGEDGTLDAKCAACNCHRNFRHREVEGEILNHHPTPPPPILHPPHHPYPRYHQRPLALPSI                                                                                                                                                                                                                                                                                                                                                                                                                                                                                                                                                                                                                                                                                                                                                                                                                                                                                                                                                                                                                                                                                                                                                               |
| NoZF-HD2  | Ntom0174840.1  | GGGGGYREDQEEELCNPNNSVTKKRFRTRFNQEQKEKMLEAEKLGWRIQRQDEGVVQQLCNEICIKRHVFKVWMHNNKTLGKKTLIQSTNP                                                                                                                                                                                                                                                                                                                                                                                                                                                                                                                                                                                                                                                                                                                                                                                                                                                                                                                                                                                                                                                                                                                                                                                                             |
|           |                | MEFDEEHEDQEEIEANIPQIPTTENNYQELGEGGPISQAAATLRKNNVPIPRYRECLKNHAVGIGGAHDGCGEFLPSGEEGTLDALKCAACNCHRNFRHREVEGEILNHHPTPPPPILHPPHHPYPRYHQRPLALPSI                                                                                                                                                                                                                                                                                                                                                                                                                                                                                                                                                                                                                                                                                                                                                                                                                                                                                                                                                                                                                                                                                                                                                              |
| NoZF-HD3  | Ntom0331490.1  | SSREDIEEYVSNPSSGGSGSRKRFRTKFTQDQKEKMFADAEGLGWRIQKENEAAVQQFAETNIRRVFKVWMHNNKNTLGKKP                                                                                                                                                                                                                                                                                                                                                                                                                                                                                                                                                                                                                                                                                                                                                                                                                                                                                                                                                                                                                                                                                                                                                                                                                      |

|           |               |                                                                                                                                               |
|-----------|---------------|-----------------------------------------------------------------------------------------------------------------------------------------------|
| NoZF-HD4  | Ntom0261800.1 | MELPIQEEEMPMPINSTYVGGGEGHGHGHIIHHDTPVPNNTNHIIPSSVANSINGPPIEATPVSADHHVPYKKIVRYKECLKNHAAAMGGNATDGCGEFMPSGEETIEALICSACNCHRNFRHKEMEGEQQLQLPPS     |
|           |               | SCDYYNLNRGGKKVYLGHSHNHHKGLLGPEPFGTIIPSRAAAPHHHQMIMSYNNMGSLPSESEEHEDINGGGVMAMAMARPLHHHNQIVKKRFRTKFTQEQQEKMFMFAEKVGWQIQQEETVVQQFCQELGIK         |
|           |               | RRVLKVMHNNKHSLAKKNSNSTIPQNQV                                                                                                                  |
| NoZF-HD5  | Ntom0292910.1 | MVVIIAKYGGGGGMVVDNAQPTFPTRTYSHQLEEERDPLVAATNRAQLRQQSTTSNGNTTTTTSSLSVVRRYRECLKNHAASMGGHILDGCGKFMPEEEGALKCAACNCHRNFRHRETSEAEQIARPRPPYS          |
|           |               | TFNPPIHSSSNYHHNYSTASPVMMTFGRNAESSSEDLNLFNSNAGGGQSSKSKKRFRTKFTAQKERMHEFAEKVGWSIQQDEQELQHFCNQVGVKRQVFRIWMHNSKQANKKRQM                           |
|           |               | MEVPNEEGEMAMPINSTYGHEHMIYHDTAPQNNHIITPPQIVTSKNGPPISTLTLESDNVVPYKKMVKYKECLKNHAAAMGGNATDGCGEFMPSGEETFEFLTCSVCNCHRNFRHKETEGELIRKVYVGHPHKAF       |
| NoZF-HD6  | Ntom0185660.1 | VYAASRAAPHQMIMSYNNHLGSFPYIEQEDGIINGGCGVMARPLNYQQLVKKRFRTKFSQEQQEKMLNFAEKIGWKMQQEDAMVQQFCQEVGVKRRVLKVMHNNKHSLAKKNSNDINLQSQI                    |
|           |               | MEHTGQDKDMGMPNSIGFNSSHLNQQUESTPFAAAKLPTAPIVSSLPDRTRNEQISHGNTIFSPNQLDQHNLTNQSDPDPTVIAVQLRQQSTTSASDKNSSVRYKECLKNHAASMGGHVLDDGCGEFMPSGEETPEY     |
|           |               | Ntom0175880.1                                                                                                                                 |
| NoZF-HD7  | Ntom0181410.1 | LKCAACDCHRNFRHKETEDESQTAGVHRNNSNSHRIHAQIPPSLPAPPQQQHYHKYTHGYSRGPMPVMMNFGGNSGVPAESSSEDLNMFNSNAGGQGVQPCTFSASKKRFRTKFTQQQKEKMQEFAEKLGWRIQ        |
|           |               | KQDEQEVQQFCNEVGVKRQVFKVFMHNCKQAIRKQT                                                                                                          |
|           |               | MDISSNTTIAITTVKTTAEPTIRIQPAKPISFSNGVLKRHNSLHLPHHHGFNKNHHHHHHHAVVVTYKECLKNHAASLGGAHDGCGEFMPSPTANPVDPTSLKCAACGCHRNFRHREPEEPVLPNQNTIPALEY        |
| NoZF-HD8  | Ntom0167540.1 | QPHRRHHPPPPPHHGASGGHSSPNSPSPPISSAAYYPASAPHMLLALSAGLSSPPAENNLISPSSNMSSANLTNPNGSGRKRFRTKFTQDQKERMLEFAEKVEWKIQKRDEELINDFCISKIGVEKGVLKVMHNN       |
|           |               | KCKKDQATAAAINTVATPNLLNGNNGNGFGLISRNNNTDTIASEFHLHHESSKDNDKDHSHQLHNNDVSVAHGVTNTGSSSSS                                                           |
|           |               | MELTCGSNPTKSTPDSENDTPPLIKPLSFSNGILKNHHFYHHQPPSAAVTYKECLKNHAASIGGHAVDGCGEFMPSPDSTPSNPTSLKCAACGCHRNFRHREPAEDSSPTHFPSHFINFRHHILPPIRRFSPSSSSPPPPF |
| NoZF-HD9  | Ntom0167540.1 | QPQPITPKVEHNPSGRKRFRTKFTQQQKEKMHSFSEKLGWKLQKCDEAKVEEFCNEVGVGKGVLRVWMHNNKNTFAKKEELQNGNNNSNGFNHGGSSSNEDHNNCGLHLHISTNGSSSSS                      |
|           |               | MQGDKANDNIYRECLRNHAASLGSYATDGCGEFTLDDDDNNNTSPGASLHCAACGCHRNFRHKVVIYGASYSNSSRDREIMAADDYAGGRTAEESPRSGKKRFRTKFTTDQKEKMLAFAEKLGWTLQRKDQEN         |
|           |               | ETERFCREVGVSARKVFKVWMHNNKNTSSISTGNASSLTQ                                                                                                      |
| NoZF-HD10 | Ntom0268890.1 | MDSTYSIPTRNHIPTKTPDSEKDFPPYPQVPLKPLSFTNVTSSKHHQVHNHQPPSAAVTYKECLKNHAASIGGYTVDGCGEFIPTDAIAADPTSLKCDVCGCHRNFRHRRKDDDFMDFRHHHAQVATPATPTALKPE     |
|           |               | KPRRRRRFRTKFSQEQQKNRMYSFSEKLGWKLQKCDEAMVEEFCNEIGVGKGVFRVWMHNNKSTLGKKGFPKCCQQYQTVPYNNKQ                                                        |
|           |               | MDSTYSIPTRNHIPTKTPDSEKDFPPYPQVPLKPLSFTNVTSSKHHQVHNHQPPSAAVTYKECLKNHAASIGGYTVDGCGEFIPTDAIAADPTSLKCDVCGCHRNFRHRRKDDDFMDFRHHHAQVATPATPTALKPE     |
| NoZF-HD11 | Ntom0318250.1 | KPRRRRRFRTKFSQEQQKNRMYSFSEKLGWKLQKCDEAMVEEFCNEIGVGKGVFRVWMHNNKSTLGKKGFPKCCQQYQTVPYNNKQ                                                        |
|           |               | MDFENHQVEEEETEPPPSYDDSLNNSNSTHPTKMPSPTPMELEPLAAVHTWHNNKPKYKECLKNHAVSIGGHAVDGCGSGSNKRFRTKFSQEQQEKMQLADKLGWRIQREDEELVQQLCNETGVRRQVFKVWMH        |
|           |               | NKNNTLGKKP                                                                                                                                    |
| NoZF-HD12 | Ntom0008120.1 | MMKKRQVVVRTDGSRRNIGSSSIRNIRYVEQCQNHAANIGGYAVDGCREFMASGEDGTTAALTCAACGCHRNFRHREVDGGEVVSECAAAAAA                                                 |
|           |               |                                                                                                                                               |
|           |               |                                                                                                                                               |
| NoZF-HD13 | Ntom0064960.1 |                                                                                                                                               |
|           |               |                                                                                                                                               |
|           |               |                                                                                                                                               |
| NoZF-HD14 | Ntom0064960.1 |                                                                                                                                               |
|           |               |                                                                                                                                               |
|           |               |                                                                                                                                               |

|           |               |                                                                                                                                              |
|-----------|---------------|----------------------------------------------------------------------------------------------------------------------------------------------|
|           |               | MDLTNNSTTTTTLANTTTTTTSAHIKPEAEIETPTQIQKPKPFSFSGVLKRKNLFQHHHPVVIYKECLKNHAASLGGHAVDGCGEFMPSPATANPADPTSLKCAACGCHRNFRHREPEEPIVIPPPPIATAALEYQPH   |
|           | Ntom0227830.1 | HRHHPPPPPPPLPRGDHSSPNSPSPPISSAYYPASAPHMLLALSAGFSGEKNHNPISSPVVNTTNCNGRKRFRTKFTPDQKVKMLEFAERVGWKMQRDEDLVRSFCNQIGIEKGVLKVWMHNNKNTFGKKLDQHHL     |
| NoZF-HD15 |               | ADININNNGNSTNVVNGFCIVSRNNNSHHNSTDSAEFHHLHHHESSYDDNKISDHIKSVGTANVVVATNGSSSSS                                                                  |
| NoZF-HD16 | Ntom0328480.1 | MTKRQVILMKDDFSDDDSTNSSFTIRTVRYRECQKNHAASVGGYAVDGCREFMPCGEEGTPGGLTCAACGCHRNFRHREVETEACDCSFPT                                                  |
| NoZF-HD17 | Ntom0181400.1 | MKKVLRKSSNDSSHNSTNSSTFTVRTVRYVEQCQKNHAASVGGYVVDGCREFMPGETSGAALTCAACGCHRNFRHKEVETDVASDCTSASSITT                                               |
|           | Ntom0241790.1 | MASNSSSTPTMTIRYGECLKNHSKKKHGHYLFDGCREFVKSGEDGTKGSYVCANCGCIRSFHRMNNQPLHRHQAIRLCFFHHCVIPNGMQPIFHPFNETQVSVSATSLPVTIISDPESVSVQENVSCVMTPPMLPLLPLF |
| NoZF-HD18 |               | PKDEMGVPVPVPLPLFPETPSSGTFGLLEGKQDMDMDAAAAAA                                                                                                  |

---
