# Supplementary material
Source: MDPI journal article supplement (https://www.mdpi.com/2073-4395/11/3/406)
Supplement: s1 [file s1]

Table S5. The syntenic pairs between tobacco and other five plant species

| NtZF-HD Gene Name                                     | NtZF-HD Gene ID         | AtZF-HD Gene ID                                                      | NtZF-HD Gene Name | NtZF-HD Gene ID                                                           | SIZF-HD Gene ID    |
|-------------------------------------------------------|-------------------------|----------------------------------------------------------------------|-------------------|---------------------------------------------------------------------------|--------------------|
| NtZF-HD4                                              | Nitab4.5_0000014g0020.1 | AT3G28917.1                                                          | NtZF-HD5          | Nitab4.5_0001507g0130.1                                                   | Solyc04g080490.3.1 |
| NtZF-HD5                                              | Nitab4.5_0001507g0130.1 | AT4G24660.2                                                          | NtZF-HD6          | Nitab4.5_0002224g0080.1                                                   | Solyc02g085160.1.1 |
| NtZF-HD5                                              | Nitab4.5_0001507g0130.1 | AT1G69600.1                                                          | NtZF-HD10         | Nitab4.5_0000274g0220.1                                                   | Solyc02g067310.3.1 |
| NtZF-HD6                                              | Nitab4.5_0002224g0080.1 | AT1G75240.1                                                          | NtZF-HD11         | Nitab4.5_0000564g0050.1                                                   | Solyc02g087970.1.1 |
| NtZF-HD10                                             | Nitab4.5_0000274g0220.1 | AT5G15210.1                                                          | NtZF-HD11         | Nitab4.5_0000564g0050.1                                                   | Solyc02g067320.2.1 |
| NtZF-HD10                                             | Nitab4.5_0000274g0220.1 | AT5G39760.1                                                          | NtZF-HD11         | Nitab4.5_0000564g0050.1                                                   | Solyc03g116070.1.1 |
| NtZF-HD11                                             | Nitab4.5_0000564g0050.1 | AT5G65410.1                                                          | NtZF-HD12         | Nitab4.5_0003247g0060.1                                                   | Solyc01g102980.3.1 |
| NtZF-HD Gene Name                                     | NtZF-HD Gene ID         | VvZF-HD ID                                                           | NtZF-HD Gene Name | NtZF-HD Gene ID                                                           | OsZF-HD Gene ID    |
| NtZF-HD5                                              | Nitab4.5_0001507g0130.1 | VIT_18s0001g07140.t01                                                | NtZF-HD5          | Nitab4.5_0001507g0130.1                                                   | Os08t0479400-01    |
| NtZF-HD6                                              | Nitab4.5_0002224g0080.1 | VIT_18s0001g12580.t01                                                | NtZF-HD5          | Nitab4.5_0001507g0130.1                                                   | Os09t0466400-01    |
| NtZF-HD6                                              | Nitab4.5_0002224g0080.1 | VIT_04s0023g01880.t01                                                | NtZF-HD6          | Nitab4.5_0002224g0080.1                                                   | Os01t0635550-00    |
| NtZF-HD11                                             | Nitab4.5_0000564g0050.1 | VIT_01s0026g02450.t01                                                | NtZF-HD Gene Name | NtZF-HD Gene ID                                                           | OsZF-HD Gene ID    |
| NtZF-HD11                                             | Nitab4.5_0000564g0050.1 | VIT_14s0108g00760.t01                                                | NtZF-HD5          | Nitab4.5_0001507g0130.1                                                   | Os08t0479400-01    |
| NtZF-HD12                                             | Nitab4.5_0003247g0060.1 | VIT_12s0035g01880.t01                                                |                   |                                                                           |                    |
| Common collinear NtZF-HD gene pairs in rice and maize |                         | Common collinear NtZF-HD gene pairs in grape, tomato and Arabidopsis |                   | Common collinear NtZF-HD gene pairs in grape, Arabidopsis, rice and maize |                    |
| NtZF-HD5                                              |                         | NtZF-HD5                                                             |                   | NtZF-HD5                                                                  |                    |
|                                                       |                         | NtZF-HD6                                                             |                   |                                                                           |                    |
|                                                       |                         | NtZF-HD11                                                            |                   |                                                                           |                    |
