# Supplementary material
Source: MDPI journal article supplement (https://www.mdpi.com/2073-4395/11/3/406)
Supplement: s1 [file s1]

Table S6. The predicted cis-acting elements in the promoter region of *NtZF-HD* genes

| Gene name        | CAT-box | ABRE | ERE | TCA-element | CGTCA-motif | MBS | TC-rich repeats | LTR | WUN-motif | ARE |
|------------------|---------|------|-----|-------------|-------------|-----|-----------------|-----|-----------|-----|
| <i>NtZF-HD1</i>  | 2       | 2    | 0   | 1           | 1           | 0   | 0               | 0   | 0         | 1   |
| <i>NtZF-HD2</i>  | 0       | 3    | 1   | 0           | 1           | 0   | 0               | 1   | 0         | 2   |
| <i>NtZF-HD3</i>  | 0       | 6    | 0   | 0           | 0           | 2   | 0               | 0   | 1         | 0   |
| <i>NtZF-HD4</i>  | 0       | 7    | 0   | 0           | 1           | 1   | 0               | 2   | 1         | 1   |
| <i>NtZF-HD5</i>  | 0       | 6    | 1   | 4           | 3           | 0   | 0               | 2   | 2         | 3   |
| <i>NtZF-HD6</i>  | 0       | 2    | 2   | 0           | 0           | 0   | 3               | 0   | 0         | 0   |
| <i>NtZF-HD7</i>  | 0       | 0    | 1   | 0           | 0           | 0   | 0               | 0   | 1         | 0   |
| <i>NtZF-HD8</i>  | 0       | 6    | 0   | 0           | 1           | 2   | 0               | 0   | 0         | 1   |
| <i>NtZF-HD9</i>  | 0       | 3    | 5   | 0           | 2           | 0   | 2               | 0   | 1         | 1   |
| <i>NtZF-HD10</i> | 1       | 2    | 1   | 1           | 0           | 3   | 0               | 0   | 3         | 4   |
| <i>NtZF-HD11</i> | 1       | 6    | 1   | 1           | 1           | 0   | 1               | 0   | 1         | 2   |
| <i>NtZF-HD12</i> | 0       | 0    | 0   | 1           | 1           | 0   | 1               | 0   | 2         | 2   |
| <i>NtZF-HD13</i> | 0       | 7    | 1   | 0           | 1           | 0   | 0               | 0   | 0         | 1   |
| <i>NtZF-HD14</i> | 0       | 0    | 1   | 0           | 0           | 0   | 0               | 0   | 0         | 0   |
| <i>NtZF-HD15</i> | 0       | 1    | 1   | 0           | 2           | 0   | 1               | 1   | 0         | 1   |
| <i>NtZF-HD16</i> | 0       | 3    | 1   | 2           | 1           | 0   | 0               | 1   | 0         | 3   |
| <i>NtZF-HD17</i> | 0       | 0    | 0   | 1           | 0           | 0   | 2               |     | 1         | 0   |
| <i>NtZF-HD18</i> | 0       | 1    | 0   | 1           | 1           | 1   | 0               | 1   | 1         | 0   |
| <i>NtZF-HD19</i> | 0       | 2    | 0   | 1           | 3           | 1   | 0               | 1   | 0         | 1   |
| <i>NtZF-HD20</i> | 0       | 10   | 8   | 1           | 2           | 2   | 0               |     | 0         | 0   |
| <i>NtZF-HD21</i> | 0       | 1    | 1   | 1           | 1           | 0   | 0               | 1   | 3         | 3   |
| <i>NtZF-HD22</i> | 0       | 2    | 2   | 1           | 1           | 1   | 1               | 0   | 0         | 1   |

|                  |   |   |   |   |   |   |   |   |   |   |
|------------------|---|---|---|---|---|---|---|---|---|---|
| <i>NtZF-HD23</i> | 0 | 0 | 1 | 0 | 0 | 0 | 2 | 0 | 1 | 1 |
| <i>NtZF-HD24</i> | 1 | 4 | 2 | 0 | 0 | 0 | 0 | 1 | 2 | 0 |
| <i>NtZF-HD25</i> | 0 | 1 | 1 | 0 | 0 | 1 | 0 | 0 | 0 | 3 |
| <i>NtZF-HD26</i> | 1 | 2 | 0 | 1 | 1 | 1 | 1 | 0 | 1 | 1 |
| <i>NtZF-HD27</i> | 0 | 2 | 1 | 1 | 0 | 1 | 1 | 1 | 1 | 2 |
| <i>NtZF-HD28</i> | 0 | 0 | 2 | 0 | 0 | 0 | 1 | 0 | 0 | 3 |
| <i>NtZF-HD29</i> | 0 | 0 | 0 | 0 | 0 | 0 | 0 | 0 | 0 | 0 |
| <i>NtZF-HD30</i> | 0 | 2 | 1 | 0 | 2 | 2 | 0 | 2 | 1 | 1 |
| <i>NtZF-HD31</i> | 1 | 8 | 4 | 1 | 1 | 0 | 0 | 1 | 1 | 0 |
| <i>NtZF-HD32</i> | 1 | 1 | 0 | 1 | 1 | 0 | 0 | 0 | 0 | 3 |

---
