# Supplementary material
Source: MDPI journal article supplement (https://www.mdpi.com/2073-4395/11/3/406)
Supplement: s1 [file s1]

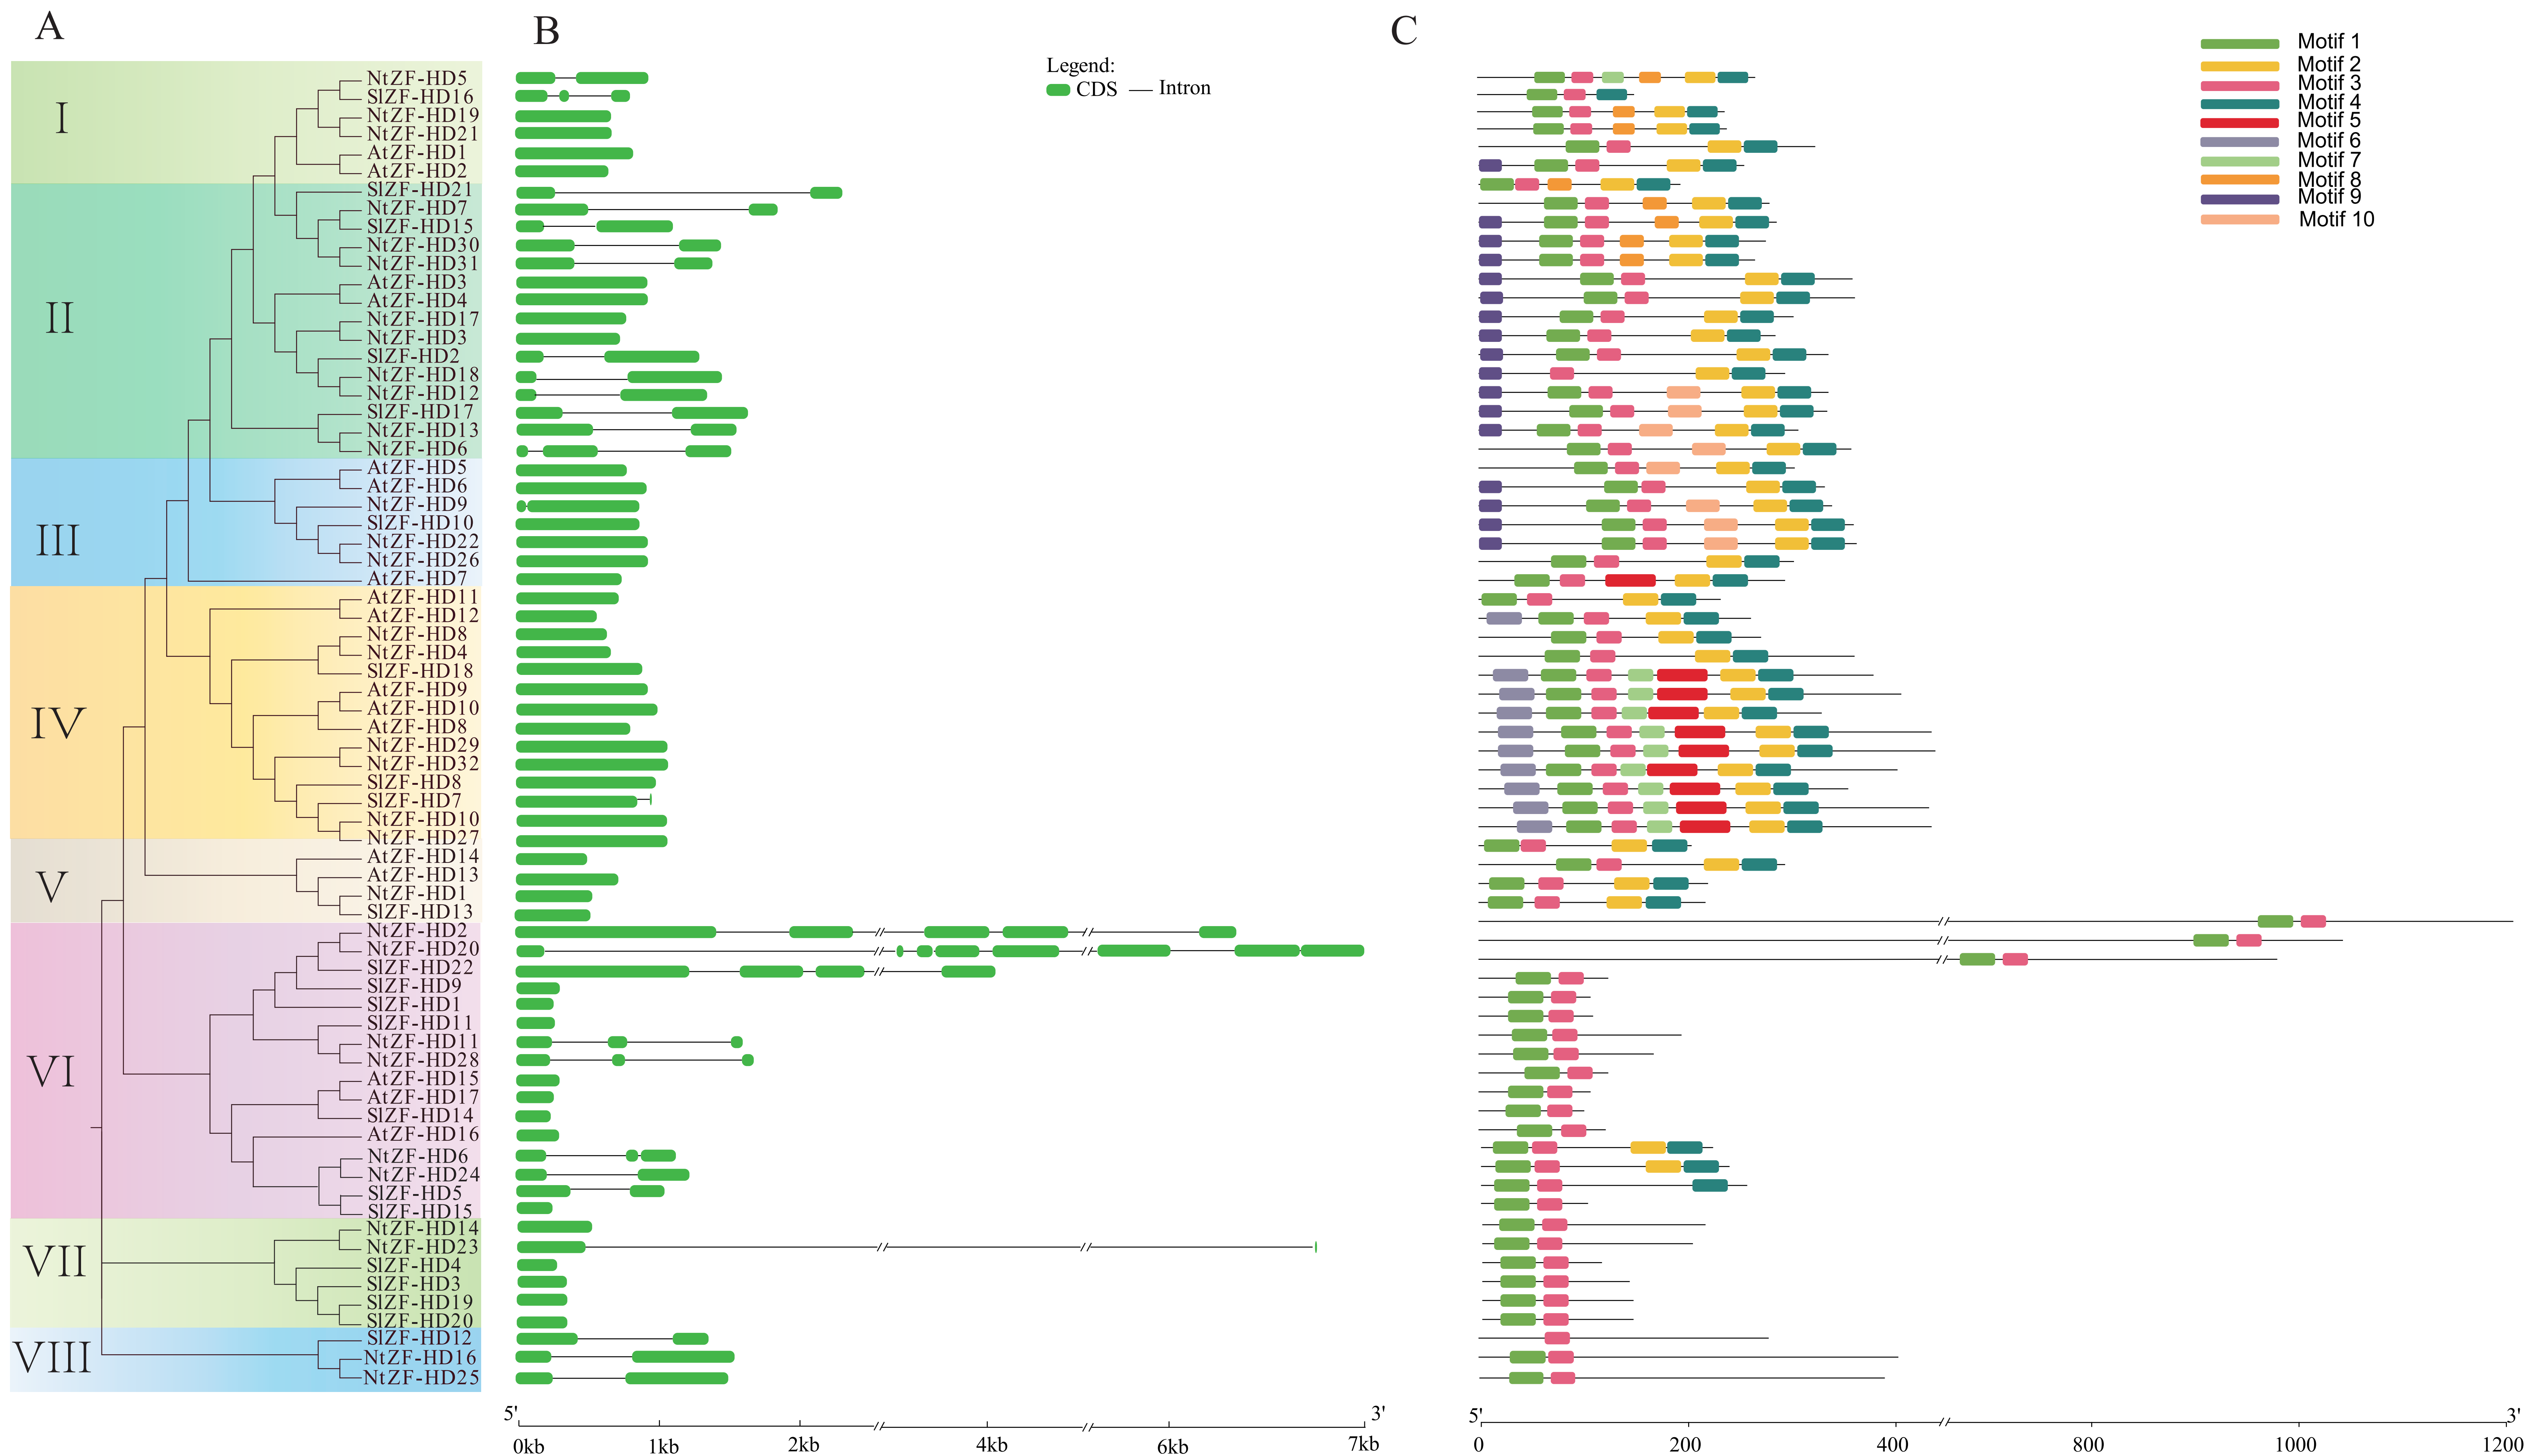

Figure S1. Gene structure and motif organizations of NtZF-HD members in tobacco. (A) The phylogenetic tree of ZF-HD genes. (B) Intron and exon structure of NtZF-HD genes. Introns and exons are represented by black lines and green boxes, respectively. (C) Conserved motif distribution of NtZF-HD proteins. Different color boxes represent different motifs.
